# Supplementary material for: Efficiently luminescent heteroleptic neutral platinum(ii) complexes based on N^O and N^P benzimidazole ligands
Source: Royal Society of Chemistry journal article supplement (doi:10.1039/d1dt02720d), 2021-01-01
Supplement: d1dt02720d1.pdf [file d1dt02720d1.pdf]

## Efficiently luminescent heteroleptic neutral platinum(II) complexes based on N<sup>^</sup>O and N<sup>^</sup>P benzimidazole ligands

Han Zhang,<sup>a</sup> Chunmei Liu,<sup>a</sup> Guojie Yin,<sup>b</sup> Chenxia Du<sup>\*a</sup> and Bin Zhang<sup>\*a</sup>

<sup>a</sup> College of Chemistry, Zhengzhou University, Zhengzhou 450001, P.R China. E-mail address: dcx@zzu.edu.cn, bz@zzu.edu.cn

<sup>b</sup> School of Environmental Engineering and Chemistry, Luoyang Institute of Science and Technology, Luoyang 471023, PR China.

### Synthesis

**General syntheses of the ligands (1a-4a and 1b-4b).** The corresponding 2-nitroaniline (5 mmol), 2-(diphenylphosphino)benzaldehyde (1.74 g, 6 mmol) and sodium hydrosulfite (3.48 g, 20 mmol) in a 5:1 (v/v) mixture of the ethanol and water were heated at 75°C for 5 h. The mixture was concentrated under reduced pressure and was extracted with ethyl acetate. Further, the crude product was purified by column chromatography with ethyl acetate/petroleum ether as the eluent to give the pure white solid 1a-4a.

The compound 1a-4a (2 mmol) and trichlorosilane (0.81 g, 6 mmol) in anhydrous toluene were heated at 120°C for 6 h under an argon atmosphere. The mixture was naturally cooled down to room temperature, and the resulting white precipitate was collected by quickly filtered under reduced pressure, then dried under vacuum to obtain the ligands 1b-4b.

*1a*: Yield: 47%; <sup>1</sup>H NMR (400 MHz, CDCl<sub>3</sub>) δ = 13.37 (s, 1H; N-H), 8.63-8.52 (m, 1H; Ar-H), 7.72 (t, *J* = 7.7 Hz, 1H; Ar-H), 7.68-7.63 (m, 1H; Ar-H), 7.63-7.52 (m, 4H; Ar-H), 7.49-7.40 (m, 3H; Ar-H), 7.40-7.30 (m, 5H; Ar-H), 7.20-7.08 (m, 3H; Ar-H). <sup>31</sup>P NMR (162 MHz, CDCl<sub>3</sub>) δ = 37.80 (s). elemental analysis calcd (%) for C<sub>25</sub>H<sub>19</sub>N<sub>2</sub>OP: C 76.13, H 4.86, N 7.10; found: C 76.08, H 4.80, N 7.14.

*2a*: Yield: 43%; <sup>1</sup>H NMR (400 MHz, DMSO-*d*<sub>6</sub>) δ = 13.38 (s, 1H; N-H), 8.34 (dd, *J* = 7.5, 4.1 Hz, 1H; Ar-H), 7.81 (t, *J* = 7.6 Hz, 1H; Ar-H), 7.64-7.56 (m, 5H; Ar-H), 7.55-7.49 (m, 2H; Ar-H), 7.49-7.42 (m, 4H; Ar-H), 7.39 (d, *J* = 8.7 Hz, 1H; Ar-H), 7.30 (dd, *J* = 14.6, 7.6 Hz, 1H; Ar-H), 7.04 (s, 1H; Ar-H), 6.86-6.70 (m, 1H; Ar-H), 3.76 (s, 3H; -OCH<sub>3</sub>). <sup>31</sup>P NMR (162 MHz, DMSO-*d*<sub>6</sub>) δ = 34.41 (s). elemental analysis calcd (%) for C<sub>26</sub>H<sub>21</sub>N<sub>2</sub>O<sub>2</sub>P: C 73.58, H 4.99, N 6.60; found: C 73.52, H 5.14, N 6.55.

*3a*: Yield: 44%; <sup>1</sup>H NMR (400 MHz, CDCl<sub>3</sub>) δ = 13.82 (s, 1H; N-H), 8.63-8.55 (m, 1H; Ar-H), 7.93 (s, 1H; Ar-H), 7.79-7.68 (m, 2H; Ar-H), 7.65-7.50 (m, 4H; Ar-H), 7.50-7.34 (m, 8H; Ar-H), 7.16 (dd, *J* = 15.0, 7.7 Hz, 1H; Ar-H). <sup>31</sup>P NMR (162 MHz, CDCl<sub>3</sub>) δ = 38.16 (s). elemental analysis calcd (%) for C<sub>26</sub>H<sub>18</sub>F<sub>3</sub>N<sub>2</sub>OP: C 67.53, H 3.92, N 6.06; found: C 67.47, H 3.88, N 6.00.

*4a*: Yield: 41%; <sup>1</sup>H NMR (400 MHz, CDCl<sub>3</sub>) δ = 13.49 (s, 1H; N-H), 8.83-8.47 (m, 1H; Ar-H), 7.75-7.66 (m, 1H; Ar-H), 7.66-7.52 (m, 4H; Ar-H), 7.50-7.42 (m, 2H; Ar-H), 7.42-7.27 (m, 5H; Ar-H), 7.18-7.00 (m, 3H; Ar-H), 6.65-6.55 (m, 1H; Ar-H), 3.98 (s, 3H; -OCH<sub>3</sub>). <sup>31</sup>P NMR (162 MHz, CDCl<sub>3</sub>) δ = 38.28 (s). elemental analysis calcd (%) for C<sub>26</sub>H<sub>21</sub>N<sub>2</sub>O<sub>2</sub>P: C 73.58, H 4.99, N

6.60; found: C 73.49, H 5.02, N 6.55.

*1b*: Yield: 81%;  $^1\text{H}$  NMR (400 MHz, DMSO- $d_6$ )  $\delta$  = 7.93 (s, 1H; N-H), 7.81-7.75 (m, 2H; Ar-H), 7.74-7.67 (m, 2H; Ar-H), 7.65-7.45 (m, 3H; Ar-H), 7.40-7.30 (m, 6H; Ar-H), 7.29-7.12 (m, 5H; Ar-H).  $^{31}\text{P}$  NMR (162 MHz, DMSO- $d_6$ )  $\delta$  = -12.26 (s). elemental analysis calcd (%) for  $\text{C}_{25}\text{H}_{19}\text{N}_2\text{P}$ : C 79.35, H 5.06, N 7.40; found: C 79.21, H 5.17, N 7.31.

*2b*: Yield: 80%;  $^1\text{H}$  NMR (400 MHz,  $\text{CDCl}_3$ )  $\delta$  = 8.37 (s, 1H; N-H), 7.67 (d,  $J$  = 9.0 Hz, 1H; Ar-H), 7.47-7.37 (m, 3H; Ar-H), 7.36-7.27 (m, 10H; Ar-H), 7.25-7.23 (m, 1H; Ar-H), 7.15-7.09 (m, 1H; Ar-H), 7.02 (dd,  $J$  = 9.0, 2.3 Hz, 1H; Ar-H), 3.81 (s, 3H; -OCH $_3$ ).  $^{31}\text{P}$  NMR (162 MHz,  $\text{CDCl}_3$ )  $\delta$  = -12.71 (s). elemental analysis calcd (%) for  $\text{C}_{26}\text{H}_{21}\text{N}_2\text{OP}$ : C 76.46, H 5.18, N 6.86; found: C 76.61, H 5.04, N 6.67.

*3b*: Yield: 75%;  $^1\text{H}$  NMR (400 MHz,  $\text{CDCl}_3$ )  $\delta$  = 8.13 (s, 1H; N-H), 7.92 (d,  $J$  = 8.6 Hz, 1H; Ar-H), 7.80 (dd,  $J$  = 7.2, 3.4 Hz, 1H; Ar-H), 7.51 (d,  $J$  = 8.7 Hz, 1H; Ar-H), 7.37 (t,  $J$  = 7.5 Hz, 1H; Ar-H), 7.30-7.27 (m, 1H; Ar-H), 7.26-7.10 (m, 12H; Ar-H).  $^{31}\text{P}$  NMR (162 MHz,  $\text{CDCl}_3$ )  $\delta$  = -11.90 (s). elemental analysis calcd (%) for  $\text{C}_{26}\text{H}_{18}\text{F}_3\text{N}_2\text{P}$ : C 69.95, H 4.06, N 6.28; found: C 70.11, H 4.21, N 6.22.

*4b*: Yield: 77%;  $^1\text{H}$  NMR (400 MHz,  $\text{CDCl}_3$ )  $\delta$  = 8.35 (s, 1H; N-H), 7.40 (tt,  $J$  = 5.8, 2.9 Hz, 1H; Ar-H), 7.30-7.27 (m, 3H; Ar-H), 7.25-7.15 (m, 7H; Ar-H), 7.13-7.04 (m, 4H; Ar-H), 7.02-6.96 (m, 1H; Ar-H), 6.60 (d,  $J$  = 8.5 Hz, 1H; Ar-H), 3.90 (s, 3H; -OCH $_3$ ).  $^{31}\text{P}$  NMR (162 MHz,  $\text{CDCl}_3$ )  $\delta$  = -10.98 (s). elemental analysis calcd (%) for  $\text{C}_{26}\text{H}_{21}\text{N}_2\text{OP}$ : C 76.46, H 5.18, N 6.86; found: C 76.30, H 5.32, N 6.74.

**General syntheses of the Pt(bt)(N<sup>^</sup>O) and Pt(bt)(N<sup>^</sup>P) complexes (5a-8a and 5b-8b).** 2-Phenylbenzothiazole (1.27 g, 6 mmol) and  $\text{K}_2\text{PtCl}_4$  (1.22 g, 3 mmol) in 2-ethoxyethanol (15 mL) and water (5 mL) was heated at 80°C for 16 h under an argon atmosphere. The mixture was naturally cooled down to room temperature, and filtered to collect the precipitate. The precipitate was washed with methanol, then dried under vacuum to give the  $\mu$ -chlorobridged cyclometalated platinum dimer as a yellow solid. The prepared  $\mu$ -chlorobridged dimer  $[\text{Pt}(\text{bt})\text{Cl}]_2$  (0.88 g, 1 mmol), corresponding ancillary ligand (1a-4a and 1b-4b) (2 mmol) and sodium carbonate (1.06 g, 10 mmol) in 2-ethoxyethanol (30 mL) were heated at 120°C for 24 h under the protection of argon. The mixture was concentrated under reduced pressure and was extracted with dichloromethane. Further, the pure product (**5a-8a** and **5b-8b**) was obtained by column chromatography with ethyl acetate/dichloromethane as the eluent.

**Complex 5a**: Yield: 35%;  $^1\text{H}$  NMR (400 MHz,  $\text{CDCl}_3$ )  $\delta$  = 9.33 (d,  $J$  = 8.2 Hz, 1H; Ar-H), 8.14 (dd,  $J$  = 7.4, 4.0 Hz, 1H; Ar-H), 7.90-7.77 (m, 3H; Ar-H), 7.76-7.63 (m, 3H; Ar-H), 7.62-7.50 (m, 3H; Ar-H), 7.46 (t,  $J$  = 7.2 Hz, 1H; Ar-H), 7.39-7.27 (m, 4H; Ar-H), 7.25-7.21 (m, 1H; Ar-H), 7.14 (dd,  $J$  = 14.2, 7.6 Hz, 1H; Ar-H), 7.09-7.01 (m, 1H; Ar-H), 7.02-6.92 (m, 4H; Ar-H), 6.88 (t,  $J$  = 7.4 Hz, 1H; Ar-H), 6.61 (t,  $J$  = 7.1 Hz, 1H; Ar-H), 5.89 (d,  $J$  = 7.8 Hz, 1H; Ar-H).  $^{13}\text{C}$  NMR (101 MHz,  $\text{CDCl}_3$ )  $\delta$  = 181.58, 157.26, 150.88, 145.56, 143.77, 142.10, 140.19, 134.18, 133.43, 132.70, 131.15, 130.24, 129.59, 129.35, 128.92, 128.47, 127.39, 127.05, 125.97, 125.35, 124.90,

124.62, 123.00, 122.35, 121.41, 120.42, 119.99, 117.61.  $^{31}\text{P}$  NMR (162 MHz,  $\text{CDCl}_3$ )  $\delta = 49.46$  (s). elemental analysis calcd (%) for  $\text{C}_{38}\text{H}_{26}\text{N}_3\text{OPPtS}$ : C 57.14, H 3.28, N 5.26; found: C 57.10, H 3.23, N 5.30. LRMS (ESI):  $m/z$  calcd for  $\text{C}_{38}\text{H}_{26}\text{N}_3\text{OPPtS}+\text{H}^+$ : 799.1  $[\text{M}+\text{H}]^+$ ; found: 799.1.

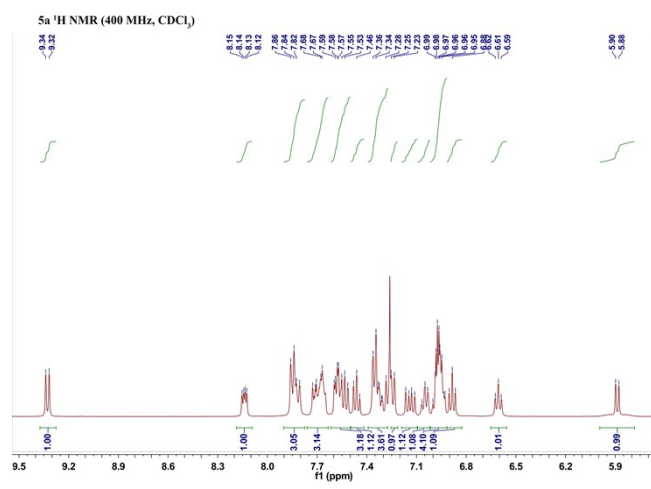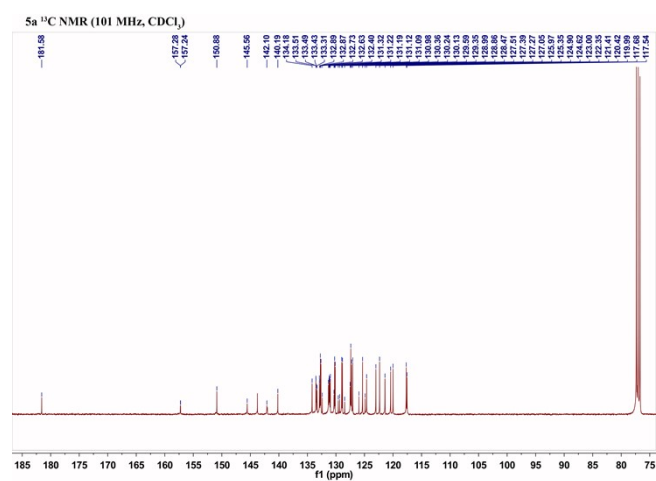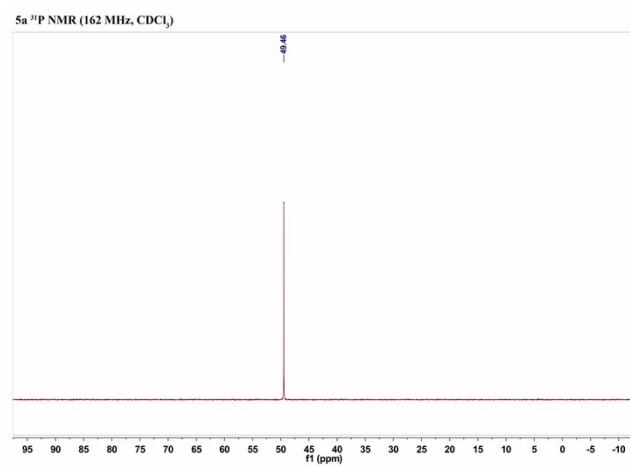

**Complex 6a:** Yield: 29%;  $^1\text{H}$  NMR (400 MHz,  $\text{CDCl}_3$ )  $\delta = 9.33$  (d,  $J = 8.1$  Hz, 1H; Ar-H), 8.12

(dd,  $J = 7.2, 4.1$  Hz, 1H; Ar-H), 7.89-7.77 (m, 3H; Ar-H), 7.70-7.62 (m, 2H; Ar-H), 7.61-7.50 (m, 4H; Ar-H), 7.49-7.42 (m, 1H; Ar-H), 7.37-7.26 (m, 3H; Ar-H), 7.25-7.22 (m, 1H; Ar-H), 7.17-7.07 (m, 2H; Ar-H), 6.98 (td,  $J = 7.6, 3.4$  Hz, 2H; Ar-H), 6.92-6.83 (m, 2H; Ar-H), 6.67-6.58 (m, 2H; Ar-H), 5.92 (dd,  $J = 13.7, 7.9$  Hz, 1H; Ar-H), 3.81 (s, 3H; -OCH<sub>3</sub>). <sup>13</sup>C NMR (101 MHz, CDCl<sub>3</sub>)  $\delta = 181.60, 155.36, 154.76, 150.92, 146.10, 144.32, 142.12, 140.19, 138.72, 134.27, 133.42, 132.70, 131.15, 130.20, 129.69, 129.28, 128.95, 128.57, 127.30, 126.07, 125.37, 125.00, 124.61, 122.99, 122.38, 121.43, 118.09, 117.78, 111.01, 110.47, 99.73, 56.06, 55.86$ . <sup>31</sup>P NMR (162 MHz, CDCl<sub>3</sub>)  $\delta = 49.40$  (s). elemental analysis calcd (%) for C<sub>39</sub>H<sub>28</sub>N<sub>3</sub>O<sub>2</sub>PPTs: C 56.52, H 3.41, N 5.07; found: C 56.49, H 3.44, N 5.12. LRMS (ESI):  $m/z$  calcd for C<sub>39</sub>H<sub>28</sub>N<sub>3</sub>O<sub>2</sub>PPTs+H<sup>+</sup>: 829.1 [M+H]<sup>+</sup>; found: 829.1.

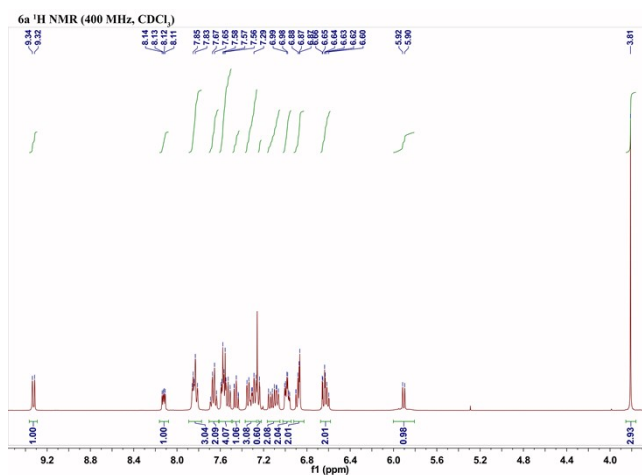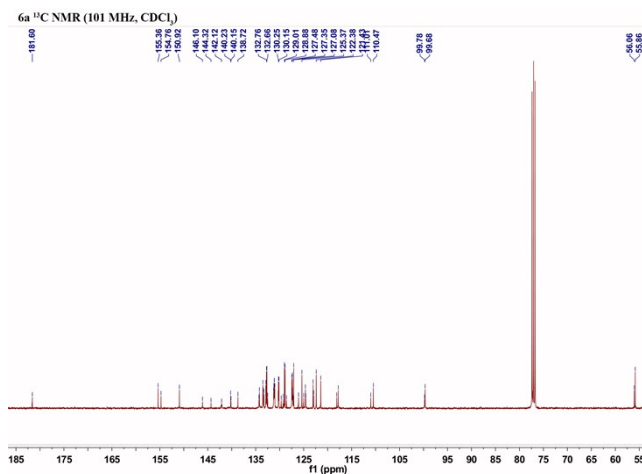

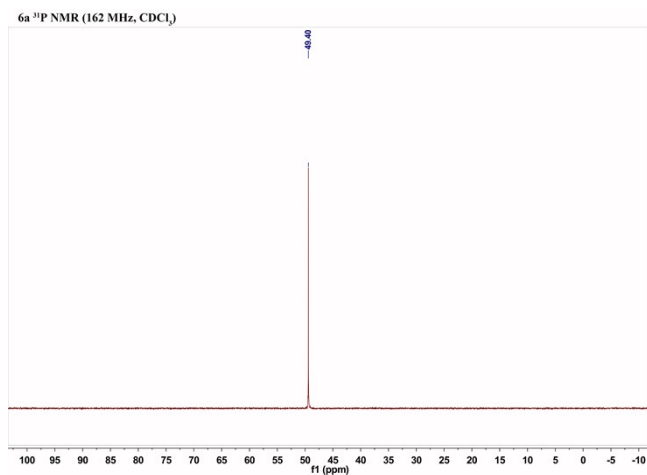

**Complex 7a:** Yield: 33%; <sup>1</sup>H NMR (400 MHz, CDCl<sub>3</sub>) δ = 9.30 (d, *J* = 7.7 Hz, 1H; Ar-H), 8.16-8.00 (m, 1H; Ar-H), 7.90-7.76 (m, 4H; Ar-H), 7.73-7.65 (m, 2H; Ar-H), 7.62-7.45 (m, 5H; Ar-H), 7.42-7.33 (m, 2H; Ar-H), 7.25-7.12 (m, 4H; Ar-H), 7.08-7.00 (m, 1H; Ar-H), 6.98-6.88 (m, 3H; Ar-H), 6.68-6.59 (m, 1H; Ar-H), 5.83 (dd, *J* = 25.5, 7.6 Hz, 1H; Ar-H). <sup>13</sup>C NMR (101 MHz, CDCl<sub>3</sub>) δ = 181.66, 159.69, 150.77, 147.59, 145.80, 144.66, 143.02, 141.36, 140.23, 133.59, 133.06, 132.67, 131.89, 131.25, 130.61, 130.24, 129.61, 129.10, 128.00, 127.23, 125.81, 125.47, 124.76, 124.30, 123.23, 122.76, 122.41, 122.13, 121.81, 121.33, 118.00, 117.59, 117.27, 116.71, 115.52, 115.05. <sup>31</sup>P NMR (162 MHz, CDCl<sub>3</sub>) δ = 49.44 (s). elemental analysis calcd (%) for C<sub>39</sub>H<sub>25</sub>F<sub>3</sub>N<sub>3</sub>OPPtS: C 54.04, H 2.91, N 4.85; found: C 53.99, H 2.87, N 4.82. LRMS (ESI): *m/z* calcd for C<sub>39</sub>H<sub>25</sub>F<sub>3</sub>N<sub>3</sub>OPPtS+H<sup>+</sup>: 867.1 [M+H]<sup>+</sup>; found: 867.1.

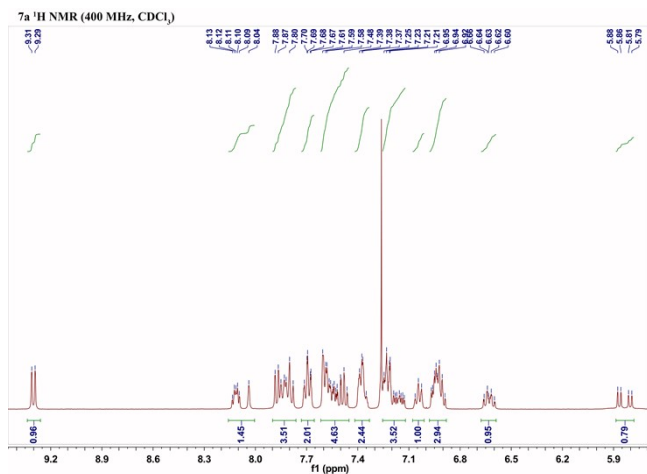

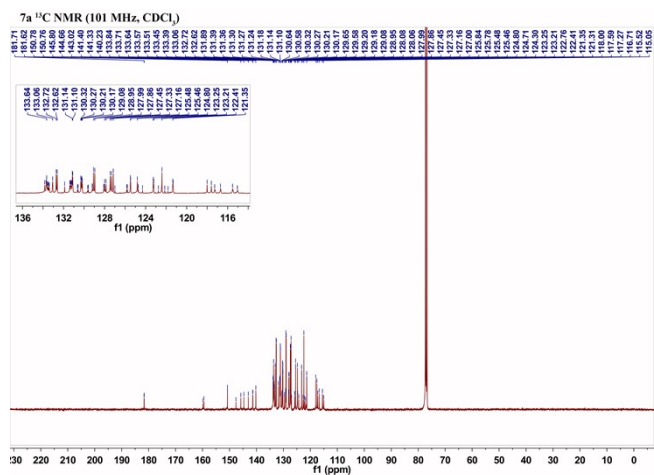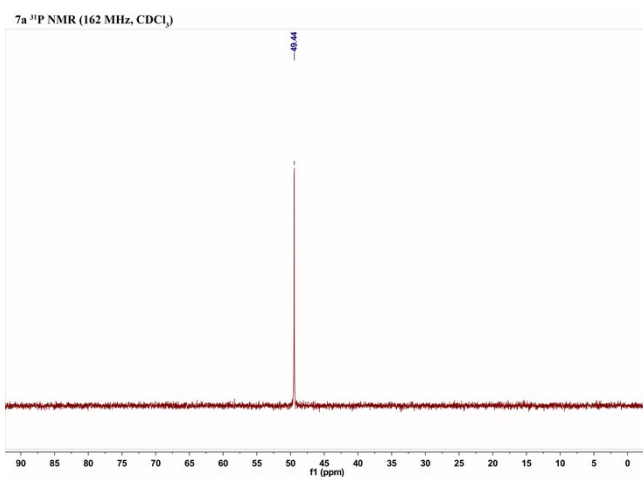

**Complex 8a:** Yield: 30%; <sup>1</sup>H NMR (400 MHz, CDCl<sub>3</sub>) δ = 9.34 (d, *J* = 8.2 Hz, 1H; Ar-H), 8.21 (dd, *J* = 7.4, 4.0 Hz, 1H; Ar-H), 7.90-7.78 (m, 3H; Ar-H), 7.71-7.61 (m, 2H; Ar-H), 7.59-7.51 (m, 3H; Ar-H), 7.50-7.43 (m, 1H; Ar-H), 7.37-7.27 (m, 5H; Ar-H), 7.14-6.95 (m, 4H; Ar-H), 6.92-6.82 (m, 2H; Ar-H), 6.63-6.56 (m, 1H; Ar-H), 6.42 (d, *J* = 7.6 Hz, 1H; Ar-H), 5.87 (d, *J* = 7.8 Hz, 1H; Ar-H), 3.92 (s, 3H; -OCH<sub>3</sub>). <sup>13</sup>C NMR (101 MHz, CDCl<sub>3</sub>) δ = 181.64, 156.27, 150.96, 150.50, 145.42, 142.05, 140.14, 136.40, 134.31, 133.34, 132.76, 131.62, 131.22, 130.88, 130.20, 129.84, 129.16, 128.85, 127.25, 126.23, 125.34, 125.16, 124.58, 122.99, 122.35, 121.44, 120.01, 110.90, 100.59, 55.36. <sup>31</sup>P NMR (162 MHz, CDCl<sub>3</sub>) δ = 49.68 (s). elemental analysis calcd (%) for C<sub>39</sub>H<sub>28</sub>N<sub>3</sub>O<sub>2</sub>PPTs: C 56.52, H 3.41, N 5.07; found: C 56.47, H 3.46, N 5.13. LRMS (ESI): *m/z* calcd for C<sub>39</sub>H<sub>28</sub>N<sub>3</sub>O<sub>2</sub>PPTs+H<sup>+</sup>: 829.1 [M+H]<sup>+</sup>; found: 829.1.

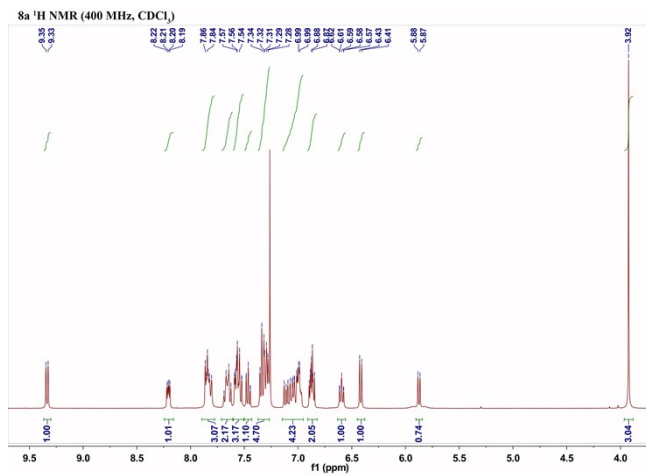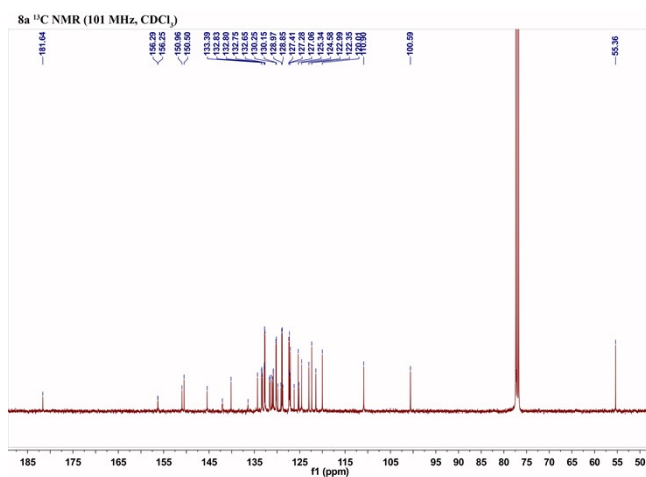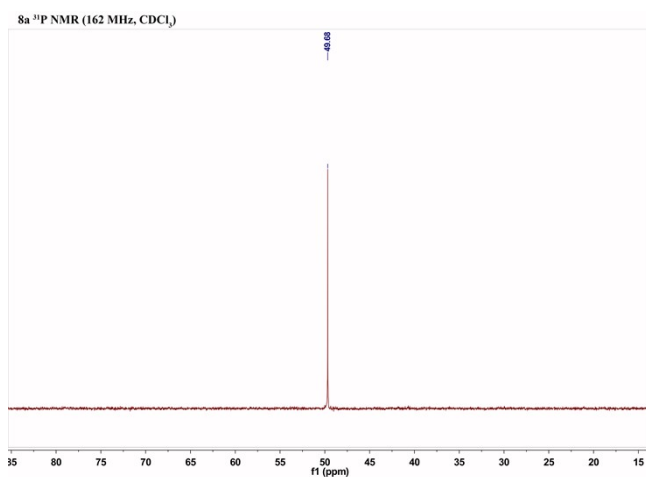

**Complex 5b:** Yield: 35%; <sup>1</sup>H NMR (400 MHz, CDCl<sub>3</sub>)  $\delta$  = 8.68 (dd,  $J$  = 7.2, 4.0 Hz, 1H; Ar-H), 7.85-7.62 (m, 5H; Ar-H), 7.61-7.48 (m, 4H; Ar-H), 7.47-7.40 (m, 2H; Ar-H), 7.33-7.27 (m, 3H; Ar-H), 7.22-7.14 (m, 3H; Ar-H), 7.07 (t,  $J$  = 7.1 Hz, 1H; Ar-H), 6.98-6.88 (m, 2H; Ar-H), 6.84 (t,  $J$  = 7.4 Hz, 1H; Ar-H), 6.77-6.65 (m, 2H; Ar-H), 6.60 (d,  $J$  = 8.5 Hz, 1H; Ar-H), 6.49 (dd,  $J$  = 7.7, 2.3 Hz, 1H; Ar-H). <sup>13</sup>C NMR (101 MHz, CDCl<sub>3</sub>)  $\delta$  = 183.21, 149.43, 145.32, 142.30, 138.01,

133.97, 132.59, 131.77, 131.25, 130.87, 130.19, 128.72, 127.92, 127.20, 126.77, 126.64, 126.15, 125.53, 124.86, 124.21, 123.96, 121.53, 120.53, 120.25, 117.92, 116.24.  $^{31}\text{P}$  NMR (162 MHz,  $\text{CDCl}_3$ )  $\delta = 13.88$  (s). elemental analysis calcd (%) for  $\text{C}_{38}\text{H}_{26}\text{N}_3\text{PPTs}$ : C 58.31, H 3.35, N 5.37; found: C 58.37, H 3.39, N 5.31. LRMS (ESI):  $m/z$  calcd for  $\text{C}_{38}\text{H}_{26}\text{N}_3\text{PPTs}+\text{H}^+$ : 783.1  $[\text{M}+\text{H}]^+$ ; found: 783.1.

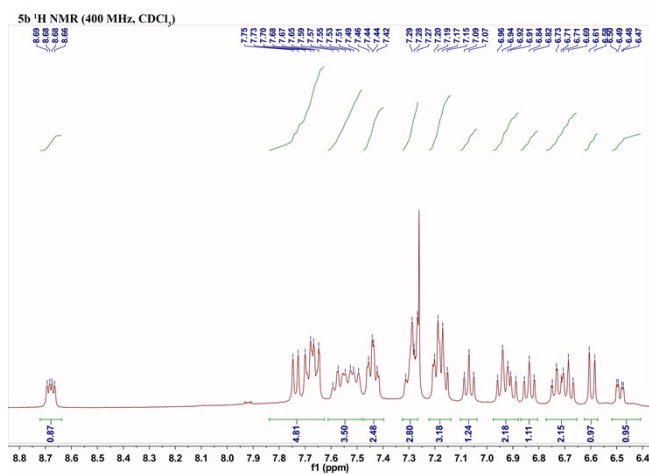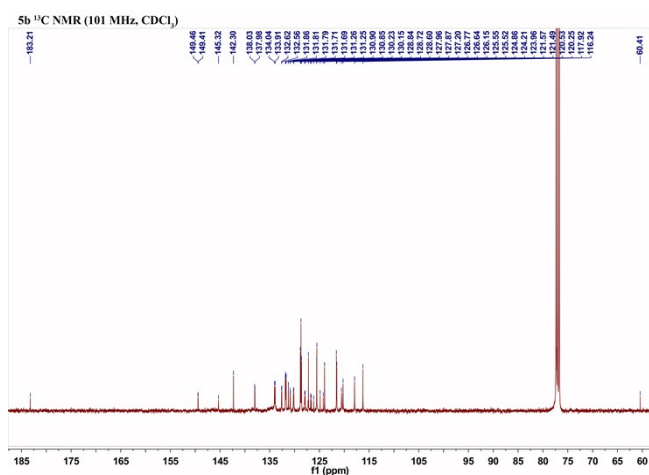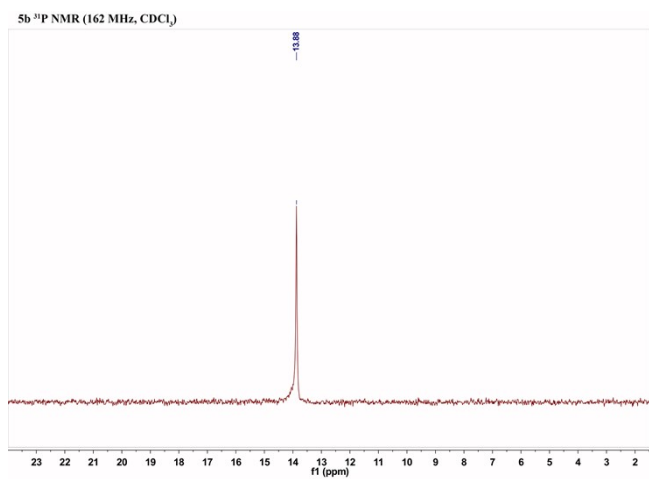



**Complex 6b:** Yield: 31%;  $^1\text{H}$  NMR (400 MHz,  $\text{CDCl}_3$ )  $\delta$  = 8.66 (s, 1H; Ar-H), 7.75 (d,  $J$  = 8.0 Hz, 1H; Ar-H), 7.70-7.63 (m, 2H; Ar-H), 7.60-7.48 (m, 4H; Ar-H), 7.47-7.41 (m, 2H; Ar-H), 7.33-7.28 (m, 2H; Ar-H), 7.24-7.16 (m, 5H; Ar-H), 7.12 (d,  $J$  = 8.8 Hz, 1H; Ar-H), 7.07 (t,  $J$  = 7.1 Hz, 1H; Ar-H), 6.95-6.85 (m, 2H; Ar-H), 6.73 (td,  $J$  = 7.6, 1.4 Hz, 1H; Ar-H), 6.65 (d,  $J$  = 8.5 Hz, 1H; Ar-H), 6.48 (dd,  $J$  = 7.7, 2.3 Hz, 1H; Ar-H), 6.36 (d,  $J$  = 6.8 Hz, 1H; Ar-H), 3.76 (s, 3H;  $-\text{OCH}_3$ ).  $^{13}\text{C}$  NMR (101 MHz,  $\text{CDCl}_3$ )  $\delta$  = 183.24, 155.19, 149.40, 142.27, 139.86, 137.99, 133.99, 132.60, 131.83, 131.29, 130.89, 130.06, 128.75, 127.82, 127.31, 126.82, 126.58, 126.20, 125.58, 124.63, 124.01, 121.56, 116.60, 111.06, 99.35, 55.49.  $^{31}\text{P}$  NMR (162 MHz,  $\text{CDCl}_3$ )  $\delta$  = 13.95 (s). elemental analysis calcd (%) for  $\text{C}_{39}\text{H}_{28}\text{N}_3\text{OPPtS}$ : C 57.63, H 3.47, N 5.17; found: C 57.69, H 3.44, N 5.11. LRMS (ESI):  $m/z$  calcd for  $\text{C}_{39}\text{H}_{28}\text{N}_3\text{OPPtS}+\text{H}^+$ : 813.1  $[\text{M}+\text{H}]^+$ ; found: 813.1.

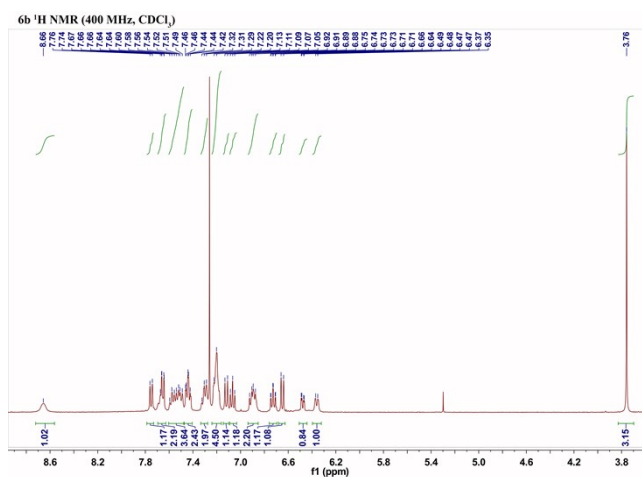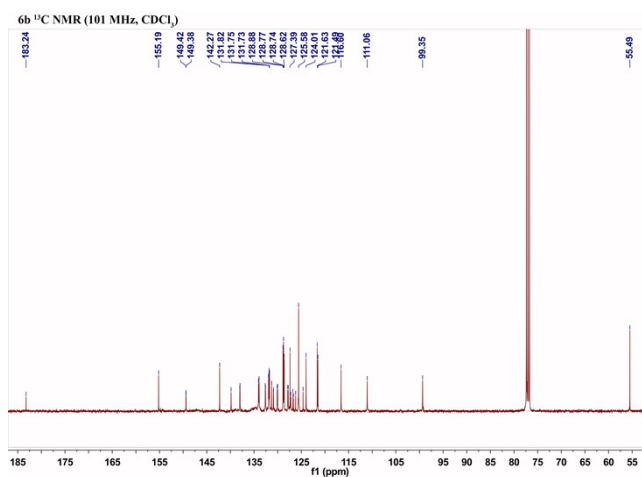

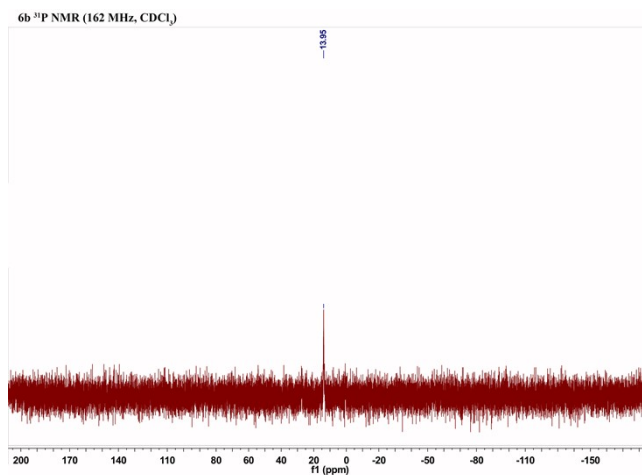

**Complex 7b:** Yield: 43%; <sup>1</sup>H NMR (400 MHz, CDCl<sub>3</sub>) δ = 8.68 (dd, *J* = 6.8, 4.1 Hz, 1H; Ar-H), 7.79-7.64 (m, 4H; Ar-H), 7.63-7.39 (m, 7H; Ar-H), 7.36-7.28 (m, 3H; Ar-H), 7.23-7.07 (m, 5H; Ar-H), 6.98-6.88 (m, 1H; Ar-H), 6.80-6.70 (m, 2H; Ar-H), 6.61-6.40 (m, 2H; Ar-H). <sup>31</sup>P NMR (162 MHz, CDCl<sub>3</sub>) δ = 13.70 (s). elemental analysis calcd (%) for C<sub>39</sub>H<sub>25</sub>F<sub>3</sub>N<sub>3</sub>PPtS: C 55.06, H 2.96, N 4.94; found: C 55.20, H 3.19, N 4.86. LRMS (ESI): *m/z* calcd for C<sub>39</sub>H<sub>25</sub>F<sub>3</sub>N<sub>3</sub>PPtS+H<sup>+</sup>: 852.1 [M+H]<sup>+</sup>; found: 852.1.

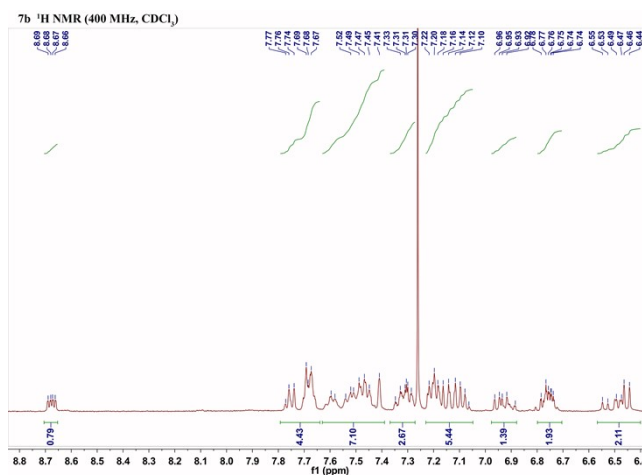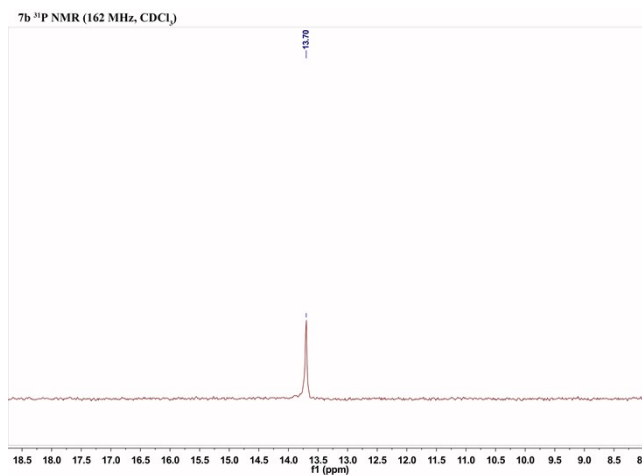

**Complex 8b:** Yield: 30%; <sup>1</sup>H NMR (400 MHz, CDCl<sub>3</sub>)  $\delta$  = 8.77 (dd,  $J$  = 7.0, 4.1 Hz, 1H; Ar-H), 7.72 (d,  $J$  = 8.0 Hz, 1H; Ar-H), 7.67-7.39 (m, 8H; Ar-H), 7.30-7.27 (m, 1H; Ar-H), 7.25-7.11 (m, 5H; Ar-H), 7.06 (t,  $J$  = 4.5, 1H; Ar-H), 6.90-6.80 (m, 3H; Ar-H), 6.73 (td,  $J$  = 7.6, 1.4 Hz, 1H; Ar-H), 6.62 (d,  $J$  = 8.4 Hz, 1H; Ar-H), 6.57 (t,  $J$  = 7.9 Hz, 1H; Ar-H), 6.50 (dd,  $J$  = 7.7, 2.1 Hz, 1H; Ar-H), 6.33 (d,  $J$  = 7.6 Hz, 1H; Ar-H), 3.94 (s, 3H; -OCH<sub>3</sub>). <sup>13</sup>C NMR (101 MHz, CDCl<sub>3</sub>)  $\delta$  = 183.12, 153.87, 150.73, 149.49, 147.82, 146.95, 142.37, 139.69, 138.01, 133.91, 132.35, 131.65, 131.20, 130.90, 130.46, 128.69, 127.51, 127.19, 126.98, 126.83, 126.36, 125.51, 124.33, 123.90, 123.68, 121.59, 120.16, 109.49, 99.87, 55.09. <sup>31</sup>P NMR (162 MHz, CDCl<sub>3</sub>)  $\delta$  = 13.29 (s). elemental analysis calcd (%) for C<sub>39</sub>H<sub>28</sub>N<sub>3</sub>OPPtS: C 57.63, H 3.47, N 5.17; found: C 57.82, H 3.36, N 5.09. LRMS (ESI): m/z calcd for C<sub>39</sub>H<sub>28</sub>N<sub>3</sub>OPPtS+H<sup>+</sup>: 813.1 [M+H]<sup>+</sup>; found: 813.1.

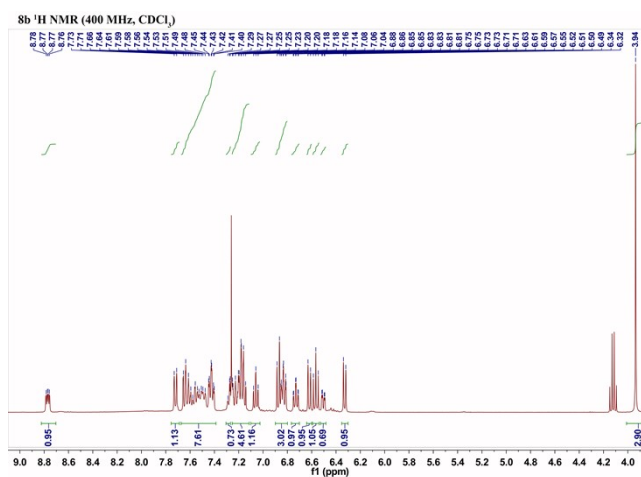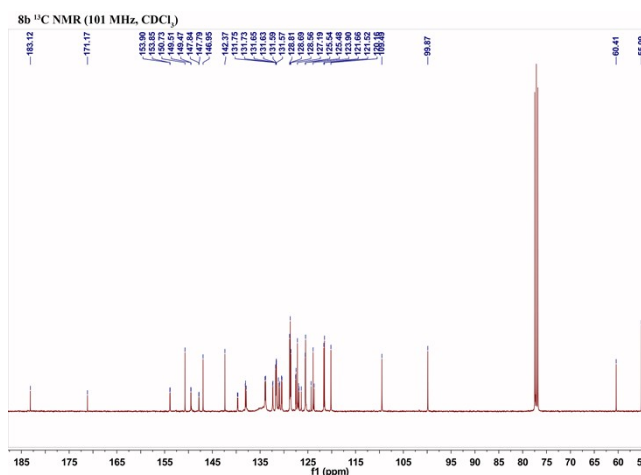

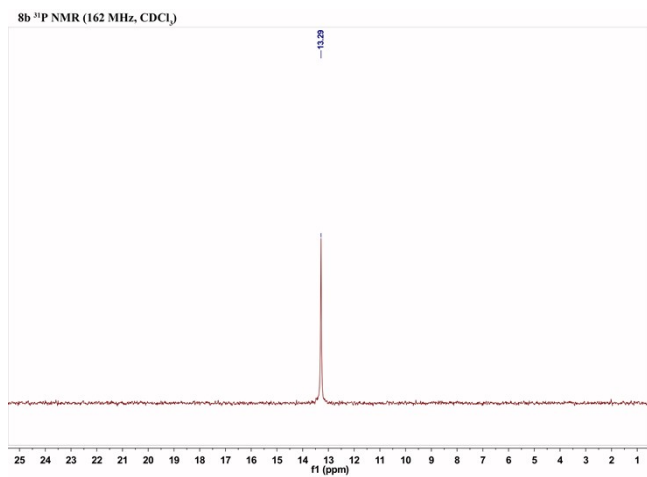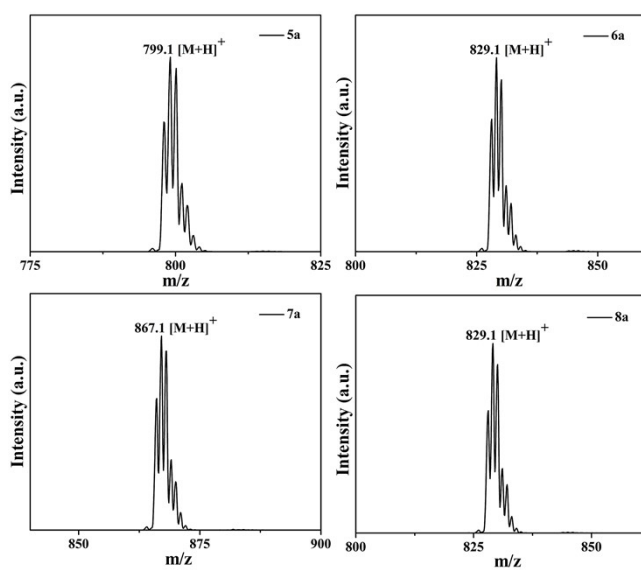

**Fig. S1** Low-resolution mass spectra (LRMS) of complexes **5a-8a**.

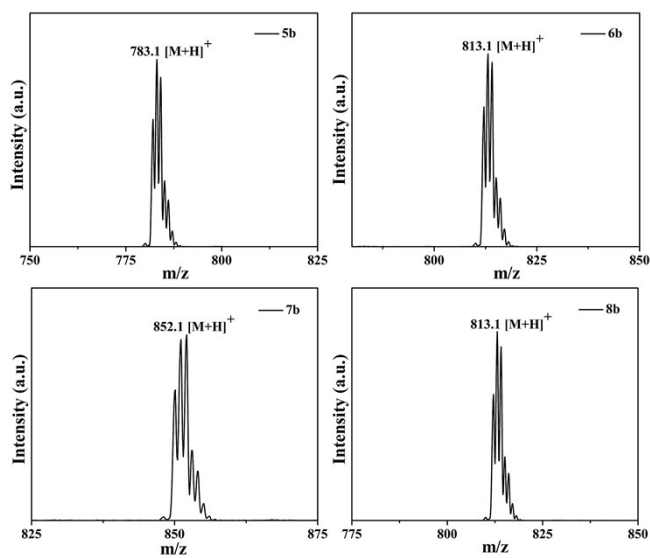

**Fig. S2** Low-resolution mass spectra (LRMS) of complexes **5b-8b**.

**Table S1.** Crystal data details and data collection of the complexes **5a** and **6a**

| Compound reference                   | <b>5a</b>                                                                          | <b>6a</b>                                                                                    |
|--------------------------------------|------------------------------------------------------------------------------------|----------------------------------------------------------------------------------------------|
| Empirical formula                    | C <sub>40</sub> H <sub>32</sub> Cl <sub>2</sub> N <sub>3</sub> O <sub>2</sub> PPtS | C <sub>39.5</sub> H <sub>28.5</sub> Cl <sub>1.5</sub> N <sub>3</sub> O <sub>2</sub> P<br>PtS |
| Formula weight                       | 915.70                                                                             | 888.45                                                                                       |
| Temperature/K                        | 200(2)                                                                             | 291.15                                                                                       |
| Crystal system                       | triclinic                                                                          | monoclinic                                                                                   |
| Space group                          | P-1                                                                                | P2 <sub>1</sub> /c                                                                           |
| a/Å                                  | 11.946(6)                                                                          | 12.6337(2)                                                                                   |
| b/Å                                  | 12.473(3)                                                                          | 13.0147(2)                                                                                   |
| c/Å                                  | 12.753(4)                                                                          | 22.8683(4)                                                                                   |
| α/°                                  | 89.885(9)                                                                          | 90                                                                                           |
| β/°                                  | 78.801(14)                                                                         | 102.644(2)                                                                                   |
| γ/°                                  | 72.895(15)                                                                         | 90                                                                                           |
| Volume/Å <sup>3</sup>                | 1778.5(11)                                                                         | 3668.91(11)                                                                                  |
| Z                                    | 2                                                                                  | 4                                                                                            |
| ρ <sub>calc</sub> /g/cm <sup>3</sup> | 1.710                                                                              | 1.608                                                                                        |
| μ/mm <sup>-1</sup>                   | 4.240                                                                              | 9.410                                                                                        |
| F(000)                               | 904.0                                                                              | 1748.0                                                                                       |
| Crystal size/mm <sup>3</sup>         | 0.2 × 0.18 × 0.17                                                                  | 0.19 × 0.18 × 0.17                                                                           |
| Radiation                            | MoKα (λ = 0.71073)                                                                 | CuKα (λ = 1.54184)                                                                           |
| 2θ range for data collection/°       | 4.37 to 53.466                                                                     | 7.17 to 133.19                                                                               |
| Reflections collected                | 30444                                                                              | 15519                                                                                        |
| Independent reflections              | 7355 [R <sub>int</sub> = 0.0489,<br>R <sub>sigma</sub> = 0.0405]                   | 6486 [R <sub>int</sub> = 0.0284,<br>R <sub>sigma</sub> = 0.0318]                             |
| Data/restraints/parameters           | 7355/0/453                                                                         | 6486/0/461                                                                                   |
| Goodness-of-fit on F <sup>2</sup>    | 1.041                                                                              | 1.118                                                                                        |
| Final R indexes [I ≥ 2σ (I)]         | R <sub>1</sub> = 0.0290,<br>wR <sub>2</sub> = 0.0754                               | R <sub>1</sub> = 0.0377,<br>wR <sub>2</sub> = 0.0972                                         |
| Final R indexes [all data]           | R <sub>1</sub> = 0.0315,<br>wR <sub>2</sub> = 0.0767                               | R <sub>1</sub> = 0.0422,<br>wR <sub>2</sub> = 0.1004                                         |
| CCDC number                          | 2101050                                                                            | 2101053                                                                                      |

**Table S2.** Crystal data details and data collection of the complexes **7a** and **8a**

| Compound reference | <b>7a</b>                                                           | <b>8a</b>                                                                          |
|--------------------|---------------------------------------------------------------------|------------------------------------------------------------------------------------|
| Empirical formula  | C <sub>39</sub> H <sub>25</sub> F <sub>3</sub> N <sub>3</sub> OPPtS | C <sub>41</sub> H <sub>33</sub> Cl <sub>3</sub> N <sub>3</sub> O <sub>3</sub> PPtS |
| Formula weight     | 866.74                                                              | 980.17                                                                             |
| Temperature/K      | 293(2)                                                              | 150.00(10)                                                                         |

|                                         |                                                                   |                                                                   |
|-----------------------------------------|-------------------------------------------------------------------|-------------------------------------------------------------------|
| Crystal system                          | monoclinic                                                        | monoclinic                                                        |
| Space group                             | P2 <sub>1</sub> /n                                                | P2 <sub>1</sub> /n                                                |
| a/Å                                     | 8.8714(2)                                                         | 14.02219(7)                                                       |
| b/Å                                     | 27.0432(4)                                                        | 13.13260(6)                                                       |
| c/Å                                     | 15.3762(3)                                                        | 21.37276(10)                                                      |
| $\alpha$ /°                             | 90                                                                | 90                                                                |
| $\beta$ /°                              | 105.911(2)                                                        | 100.1698(4)                                                       |
| $\gamma$ /°                             | 90                                                                | 90                                                                |
| Volume/Å <sup>3</sup>                   | 3547.59(12)                                                       | 3873.91(3)                                                        |
| Z                                       | 4                                                                 | 4                                                                 |
| $\rho_{\text{calc}}/\text{cm}^3$        | 1.623                                                             | 1.681                                                             |
| $\mu/\text{mm}^{-1}$                    | 8.805                                                             | 9.924                                                             |
| F(000)                                  | 1696.0                                                            | 1936.0                                                            |
| Crystal size/mm <sup>3</sup>            | 0.22 × 0.21 × 0.2                                                 | 0.16 × 0.14 × 0.12                                                |
| Radiation                               | CuK $\alpha$ ( $\lambda$ = 1.54184)                               | CuK $\alpha$ ( $\lambda$ = 1.54184)                               |
| 2 $\Theta$ range for data collection/°  | 6.536 to 133.188                                                  | 7.012 to 134.148                                                  |
| Reflections collected                   | 14586                                                             | 21243                                                             |
| Independent reflections                 | 6268 [ $R_{\text{int}}$ = 0.0394,<br>$R_{\text{sigma}}$ = 0.0466] | 6897 [ $R_{\text{int}}$ = 0.0275,<br>$R_{\text{sigma}}$ = 0.0247] |
| Data/restraints/parameters              | 6268/26/442                                                       | 6897/0/481                                                        |
| Goodness-of-fit on F <sup>2</sup>       | 1.069                                                             | 1.048                                                             |
| Final R indexes [ $I \geq 2\sigma(I)$ ] | $R_1$ = 0.0451,<br>$wR_2$ = 0.1145                                | $R_1$ = 0.0279,<br>$wR_2$ = 0.0719                                |
| Final R indexes [all data]              | $R_1$ = 0.0518,<br>$wR_2$ = 0.1199                                | $R_1$ = 0.0288,<br>$wR_2$ = 0.0725                                |
| CCDC number                             | 2101087                                                           | 2101059                                                           |

**Table S3.** Crystal data details and data collection of the complexes **5b**, **6b** and **8b**

| Compound reference | <b>5b</b>                                                           | <b>6b</b>                                                          | <b>8b</b>                                                            |
|--------------------|---------------------------------------------------------------------|--------------------------------------------------------------------|----------------------------------------------------------------------|
| Empirical formula  | C <sub>39</sub> H <sub>27</sub> Cl <sub>3</sub> N <sub>3</sub> PPtS | C <sub>40</sub> H <sub>31</sub> N <sub>3</sub> O <sub>2</sub> PPtS | C <sub>39</sub> H <sub>29</sub> N <sub>3</sub> O <sub>1.5</sub> PPtS |
| Formula weight     | 902.10                                                              | 843.80                                                             | 821.77                                                               |
| Temperature/K      | 291.15                                                              | 291.15                                                             | 291.15                                                               |
| Crystal system     | monoclinic                                                          | monoclinic                                                         | monoclinic                                                           |
| Space group        | P2 <sub>1</sub> /n                                                  | P2 <sub>1</sub> /c                                                 | C2/c                                                                 |
| a/Å                | 11.30060(10)                                                        | 11.1632(2)                                                         | 38.3206(9)                                                           |
| b/Å                | 13.78120(10)                                                        | 18.2105(4)                                                         | 7.5249(2)                                                            |
| c/Å                | 23.3186(2)                                                          | 18.5907(3)                                                         | 23.6650(5)                                                           |
| $\alpha$ /°        | 90                                                                  | 90                                                                 | 90                                                                   |

|                                                |                                                                     |                                                                     |                                                                     |
|------------------------------------------------|---------------------------------------------------------------------|---------------------------------------------------------------------|---------------------------------------------------------------------|
| $\beta/^\circ$                                 | 100.5730(10)                                                        | 103.612(2)                                                          | 109.508(2)                                                          |
| $\gamma/^\circ$                                | 90                                                                  | 90                                                                  | 90                                                                  |
| Volume/ $\text{\AA}^3$                         | 3569.88(5)                                                          | 3673.10(12)                                                         | 6432.3(3)                                                           |
| Z                                              | 4                                                                   | 4                                                                   | 8                                                                   |
| $\rho_{\text{calc}}/\text{g/cm}^3$             | 1.678                                                               | 1.526                                                               | 1.697                                                               |
| $\mu/\text{mm}^{-1}$                           | 10.646                                                              | 8.385                                                               | 9.546                                                               |
| F(000)                                         | 1768.0                                                              | 1668.0                                                              | 3240.0                                                              |
| Crystal size/ $\text{mm}^3$                    | $0.22 \times 0.2 \times 0.19$                                       | $0.22 \times 0.2 \times 0.2$                                        | $0.2 \times 0.19 \times 0.17$                                       |
| Radiation                                      | CuK $\alpha$ ( $\lambda = 1.54184$ )                                | CuK $\alpha$ ( $\lambda = 1.54184$ )                                | CuK $\alpha$ ( $\lambda = 1.54184$ )                                |
| 2 $\Theta$ range for data collection/ $^\circ$ | 7.484 to 141.764                                                    | 8.15 to 133.192                                                     | 7.926 to 130.158                                                    |
| Reflections collected                          | 14881                                                               | 15942                                                               | 11550                                                               |
| Independent reflections                        | 6757 [ $R_{\text{int}} = 0.0351$ ,<br>$R_{\text{sigma}} = 0.0447$ ] | 6487 [ $R_{\text{int}} = 0.0304$ ,<br>$R_{\text{sigma}} = 0.0396$ ] | 5432 [ $R_{\text{int}} = 0.0310$ ,<br>$R_{\text{sigma}} = 0.0395$ ] |
| Data/restraints/parameters                     | 6757/12/433                                                         | 6487/1/436                                                          | 5432/0/421                                                          |
| Goodness-of-fit on $F^2$                       | 1.017                                                               | 1.031                                                               | 1.082                                                               |
| Final R indexes [ $I \geq 2\sigma(I)$ ]        | $R_1 = 0.0439$ ,<br>$wR_2 = 0.1203$                                 | $R_1 = 0.0361$ ,<br>$wR_2 = 0.0904$                                 | $R_1 = 0.0369$ ,<br>$wR_2 = 0.0956$                                 |
| Final R indexes [all data]                     | $R_1 = 0.0498$ ,<br>$wR_2 = 0.1262$                                 | $R_1 = 0.0483$ ,<br>$wR_2 = 0.0988$                                 | $R_1 = 0.0413$ ,<br>$wR_2 = 0.0996$                                 |
| CCDC number                                    | 2101051                                                             | 2101055                                                             | 2101060                                                             |

**Table S4.** Selected bond lengths ( $\text{\AA}$ ) and angles (deg) for the complexes

| Complex   |           | Length/ $\text{\AA}$ |           | Angle/ $^\circ$ |
|-----------|-----------|----------------------|-----------|-----------------|
| <b>5a</b> | Pt1-O1    | 2.163(2)             | N1-Pt1-O1 | 95.80(10)       |
|           | Pt1-N1    | 2.050(3)             | N2-Pt1-O1 | 88.52(10)       |
|           | Pt1-N2    | 2.022(3)             | N2-Pt1-N1 | 174.09(11)      |
|           | Pt1-C1    | 1.976(4)             | C1-Pt1-O1 | 176.75(10)      |
|           |           |                      | C1-Pt1-N1 | 81.02(13)       |
|           |           |                      | C1-Pt1-N2 | 94.61(13)       |
|           | <b>6a</b> | Pt1-O1               | 2.158(4)  | N1-Pt1-O1       |
| Pt1-N1    |           | 2.033(4)             | N2-Pt1-O1 | 89.81(16)       |
| Pt1-N2    |           | 2.023(4)             | N2-Pt1-N1 | 171.68(17)      |
| Pt1-C1    |           | 1.973(5)             | C1-Pt1-O1 | 173.86(18)      |
|           |           |                      | C1-Pt1-N1 | 81.7(2)         |
|           |           |                      | C1-Pt1-N2 | 93.66(19)       |
| <b>7a</b> |           | Pt1-O1               | 2.149(5)  | N1-Pt1-O1       |
|           | Pt1-N1    | 2.039(5)             | N2-Pt1-O1 | 87.41(18)       |
|           | Pt1-N2    | 2.013(4)             | N2-Pt1-N1 | 173.3(2)        |
|           | Pt1-C1    | 1.989(6)             | C1-Pt1-O1 | 178.4(2)        |
|           |           |                      | C1-Pt1-N1 | 81.0(2)         |

|           |        |            |           |            |
|-----------|--------|------------|-----------|------------|
|           |        |            | C1-Pt1-N2 | 94.2(2)    |
| <b>8a</b> | Pt1-O1 | 2.171(2)   | N1-Pt1-O1 | 96.17(11)  |
|           | Pt1-N1 | 2.027(3)   | N2-Pt1-O1 | 88.47(10)  |
|           | Pt1-N2 | 1.997(3)   | N2-Pt1-N1 | 175.01(11) |
|           | Pt1-C1 | 1.968(4)   | C1-Pt1-O1 | 172.25(12) |
|           |        |            | C1-Pt1-N1 | 81.79(14)  |
|           |        | C1-Pt1-N2  | 93.84(13) |            |
| <b>5b</b> | Pt1-C1 | 2.042(6)   | C1-Pt1-N1 | 80.1(2)    |
|           | Pt1-N1 | 2.091(5)   | N2-Pt1-P1 | 86.51(13)  |
|           | Pt1-N2 | 2.097(4)   | C1-Pt1-N2 | 163.5(2)   |
|           | Pt1-P1 | 2.2140(14) | N1-Pt1-P1 | 170.39(14) |
|           |        |            | C1-Pt1-P1 | 99.85(18)  |
|           |        | N1-Pt1-N2  | 96.12(18) |            |
| <b>6b</b> | Pt1-C1 | 2.028(5)   | C1-Pt1-N1 | 80.39(19)  |
|           | Pt1-N1 | 2.106(4)   | N2-Pt1-P1 | 83.78(11)  |
|           | Pt1-N2 | 2.082(4)   | C1-Pt1-N2 | 167.14(19) |
|           | Pt1-P1 | 2.2001(12) | N1-Pt1-P1 | 167.75(12) |
|           |        |            | C1-Pt1-P1 | 100.75(15) |
|           |        | N1-Pt1-N2  | 97.77(16) |            |
| <b>8b</b> | Pt1-C1 | 2.000(5)   | C1-Pt1-N1 | 80.15(19)  |
|           | Pt1-N1 | 2.103(4)   | N2-Pt1-P1 | 85.75(13)  |
|           | Pt1-N2 | 2.084(4)   | C1-Pt1-N2 | 166.1(2)   |
|           | Pt1-P1 | 2.2064(12) | N1-Pt1-P1 | 166.99(14) |
|           |        |            | C1-Pt1-P1 | 102.37(15) |
|           |        | N1-Pt1-N2  | 94.48(17) |            |

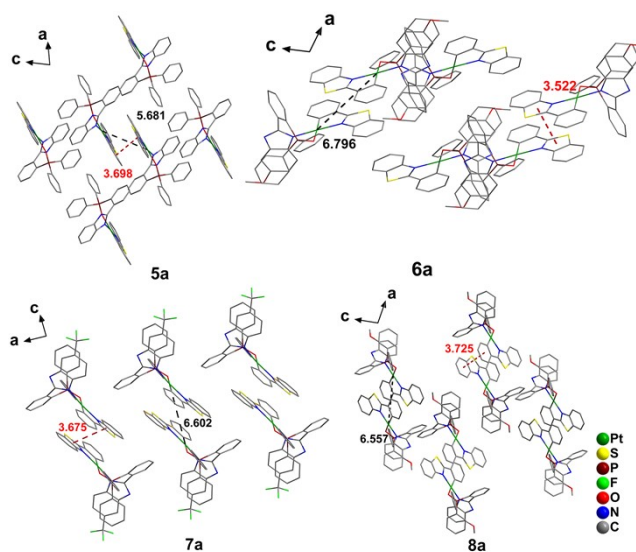

**Fig. S3** Packing diagram of the complexes (**5a-8a**) viewed along the b-axis. Solvent molecules and hydrogen atoms are omitted for clarity.



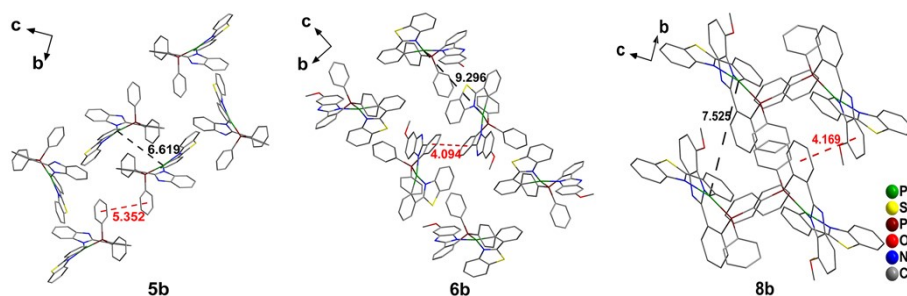

**Fig. S4** Packing diagram of the complex **5b**, **6b** and **8b** viewed along the a-axis. Solvent molecules and hydrogen atoms are omitted for clarity.

**Table S5.** Selected bond lengths (Å) and angles (deg) for the complexes in  $S_0$  state

| Complex   |           | Length/Å |           | Angle/°   |
|-----------|-----------|----------|-----------|-----------|
| <b>5a</b> | Pt1-O1    | 2.240(0) | N1-Pt1-O1 | 97.27(5)  |
|           | Pt1-N1    | 2.089(5) | N2-Pt1-O1 | 88.52(9)  |
|           | Pt1-N2    | 2.041(5) | N2-Pt1-N1 | 174.89(0) |
|           | Pt1-C1    | 1.990(8) | C1-Pt1-O1 | 174.49(2) |
|           |           |          | C1-Pt1-N1 | 80.43(8)  |
|           |           |          | C1-Pt1-N2 | 95.58(9)  |
|           | <b>6a</b> | Pt1-O1   | 2.246(7)  | N1-Pt1-O1 |
| Pt1-N1    |           | 2.088(8) | N2-Pt1-O1 | 86.75(5)  |
| Pt1-N2    |           | 2.040(2) | N2-Pt1-N1 | 174.92(1) |
| Pt1-C1    |           | 1.990(0) | C1-Pt1-O1 | 173.55(6) |
|           |           |          | C1-Pt1-N1 | 80.47(9)  |
|           |           |          | C1-Pt1-N2 | 95.64(7)  |
| <b>7a</b> |           | Pt1-O1   | 2.245(5)  | N1-Pt1-O1 |
|           | Pt1-N1    | 2.087(4) | N2-Pt1-O1 | 86.78(3)  |
|           | Pt1-N2    | 2.043(1) | N2-Pt1-N1 | 175.25(1) |
|           | Pt1-C1    | 1.991(3) | C1-Pt1-O1 | 174.19(2) |
|           |           |          | C1-Pt1-N1 | 80.50(7)  |
|           |           |          | C1-Pt1-N2 | 95.71(8)  |
|           | <b>8a</b> | Pt1-O1   | 2.238(0)  | N1-Pt1-O1 |
| Pt1-N1    |           | 2.089(2) | N2-Pt1-O1 | 86.72(3)  |
| Pt1-N2    |           | 2.041(3) | N2-Pt1-N1 | 175.17(2) |
| Pt1-C1    |           | 1.990(4) | C1-Pt1-O1 | 174.42(3) |
|           |           |          | C1-Pt1-N1 | 80.46(9)  |
|           |           |          | C1-Pt1-N2 | 95.85(7)  |
| <b>5b</b> |           | Pt1-C1   | 2.039(2)  | C1-Pt1-N1 |
|           | Pt1-N1    | 2.165(9) | N2-Pt1-P1 | 82.56(2)  |
|           | Pt1-N2    | 2.156(1) | C1-Pt1-N2 | 166.93(9) |
|           | Pt1-P1    | 2.280(6) | N1-Pt1-P1 | 167.52(9) |
|           |           |          | C1-Pt1-P1 | 102.43(7) |
|           |           |          | N1-Pt1-N2 | 98.23(6)  |
| <b>6b</b> | Pt1-C1    | 2.038(9) | C1-Pt1-N1 | 79.53(5)  |
|           | Pt1-N1    | 2.165(5) | N2-Pt1-P1 | 82.77(5)  |

|           |        |          |           |           |
|-----------|--------|----------|-----------|-----------|
|           | Pt1-N2 | 2.150(1) | C1-Pt1-N2 | 166.75(3) |
|           | Pt1-P1 | 2.280(0) | N1-Pt1-P1 | 167.32(7) |
|           |        |          | C1-Pt1-P1 | 102.41(8) |
|           |        |          | N1-Pt1-N2 | 98.10(5)  |
| <b>7b</b> | Pt1-C1 | 2.037(6) | C1-Pt1-N1 | 79.60(4)  |
|           | Pt1-N1 | 2.162(6) | N2-Pt1-P1 | 82.94(0)  |
|           | Pt1-N2 | 2.159(0) | C1-Pt1-N2 | 166.34(1) |
|           | Pt1-P1 | 2.280(3) | N1-Pt1-P1 | 167.74(8) |
|           |        |          | C1-Pt1-P1 | 102.16(0) |
|           |        |          | N1-Pt1-N2 | 98.13(4)  |
| <b>8b</b> | Pt1-C1 | 2.036(8) | C1-Pt1-N1 | 79.48(7)  |
|           | Pt1-N1 | 2.171(9) | N2-Pt1-P1 | 82.54(5)  |
|           | Pt1-N2 | 2.164(6) | C1-Pt1-N2 | 168.37(5) |
|           | Pt1-P1 | 2.273(8) | N1-Pt1-P1 | 165.30(5) |
|           |        |          | C1-Pt1-P1 | 102.32(4) |
|           |        |          | N1-Pt1-N2 | 98.51(9)  |

**Table S6.** Cartesian coordinates for optimized ground state structure of the complexes by theoretical calculations.

| complex   | atom     | x        | y        | z        | complex   | atom     | x        | y        | z        |
|-----------|----------|----------|----------|----------|-----------|----------|----------|----------|----------|
| <b>5a</b> | Pt       | -1.00503 | -0.41206 | -0.09731 | <b>6a</b> | Pt       | -0.55516 | -0.94366 | -0.03812 |
|           | S        | -5.18786 | 1.33448  | -0.07333 |           | S        | -4.49365 | -3.17789 | -0.22824 |
|           | P        | 1.96515  | 1.07872  | 0.08041  |           | P        | 0.0617   | 2.31626  | 0.08399  |
|           | O        | 0.58057  | 1.08887  | -0.59781 |           | O        | -0.71873 | 1.21064  | -0.65454 |
|           | N        | -2.64793 | 0.86463  | -0.28906 |           | O        | 6.03354  | -2.75396 | -1.88932 |
|           | N        | 0.49379  | -1.79272 | 0.02631  |           | N        | -2.54545 | -1.47573 | -0.38289 |
|           | N        | 2.15384  | -3.08621 | 0.91285  |           | N        | 1.43408  | -0.59101 | 0.24603  |
|           | C        | -2.45108 | -1.64151 | 0.50344  |           | N        | 3.38618  | -0.0576  | 1.30198  |
|           | C        | -2.32816 | -2.96559 | 0.94899  |           | C        | -0.53121 | -2.79638 | 0.68775  |
|           | H        | -1.35819 | -3.44897 | 0.94971  |           | C        | 0.54392  | -3.47899 | 1.27518  |
|           | C        | -3.44515 | -3.68307 | 1.38858  |           | H        | 1.52049  | -3.01143 | 1.323    |
|           | H        | -3.319   | -4.70897 | 1.72475  |           | C        | 0.37891  | -4.76541 | 1.79832  |
|           | C        | -4.72033 | -3.1043  | 1.40235  |           | H        | 1.23124  | -5.27073 | 2.24507  |
|           | H        | -5.57861 | -3.67365 | 1.74474  |           | C        | -0.86245 | -5.41241 | 1.75628  |
|           | C        | -4.87665 | -1.79026 | 0.97591  |           | H        | -0.97565 | -6.41114 | 2.16591  |
|           | H        | -5.8596  | -1.32594 | 0.98572  |           | C        | -1.95115 | -4.76194 | 1.18645  |
|           | C        | -3.75531 | -1.06969 | 0.53554  |           | H        | -2.92168 | -5.25051 | 1.15069  |
|           | C        | -3.78919 | 0.29986  | 0.0788   |           | C        | -1.786   | -3.47066 | 0.6613   |
|           | C        | -2.81418 | 2.16827  | -0.7498  |           | C        | -2.83865 | -2.69384 | 0.04932  |
| C         | -1.81617 | 3.01551  | -1.25171 | C        | -3.6235   | -0.84653 | -0.99953 |          |          |
| H         | -0.79438 | 2.65996  | -1.30538 | C        | -3.62431  | 0.41953  | -1.60207 |          |          |
| C         | -2.18066 | 4.29123  | -1.67002 | H        | -2.71325  | 1.00556  | -1.60954 |          |          |
| H         | -1.41932 | 4.95866  | -2.06181 | C        | -4.80615  | 0.87795  | -2.17538 |          |          |
| C         | -3.51375 | 4.73099  | -1.59916 | H        | -4.8227   | 1.85565  | -2.64695 |          |          |

|   |          |          |          |   |          |          |          |
|---|----------|----------|----------|---|----------|----------|----------|
| H | -3.7697  | 5.73202  | -1.93162 | C | -5.9764  | 0.09954  | -2.15937 |
| C | -4.51647 | 3.89442  | -1.114   | H | -6.88486 | 0.48256  | -2.61335 |
| H | -5.54794 | 4.22691  | -1.06707 | C | -5.98513 | -1.16482 | -1.57446 |
| C | -4.15374 | 2.61309  | -0.69623 | H | -6.88393 | -1.77228 | -1.56922 |
| C | 1.96324  | 0.41631  | 1.78431  | C | -4.79973 | -1.62859 | -1.00193 |
| C | 2.23762  | 1.28637  | 2.85268  | C | 0.41408  | 1.95087  | 1.83955  |
| H | 2.42315  | 2.33648  | 2.65999  | C | -0.22038 | 2.71615  | 2.83252  |
| C | 2.2915   | 0.81826  | 4.16507  | H | -0.9326  | 3.48284  | 2.55076  |
| H | 2.50147  | 1.50887  | 4.9757   | C | 0.06284  | 2.51793  | 4.18325  |
| C | 2.08961  | -0.53751 | 4.42344  | H | -0.44205 | 3.11776  | 4.93389  |
| H | 2.14182  | -0.91461 | 5.44038  | C | 1.00643  | 1.56083  | 4.5573   |
| C | 1.81585  | -1.41245 | 3.3739   | H | 1.2457   | 1.40883  | 5.60555  |
| H | 1.65879  | -2.46832 | 3.56507  | C | 1.64034  | 0.79106  | 3.58414  |
| C | 1.72712  | -0.95727 | 2.05044  | H | 2.37234  | 0.04207  | 3.8662   |
| C | 1.4521   | -1.9555  | 0.99548  | C | 1.34424  | 0.95     | 2.22209  |
| C | 1.64412  | -3.71296 | -0.20494 | C | 2.05889  | 0.09281  | 1.25516  |
| C | 2.00253  | -4.93396 | -0.80107 | C | 2.46145  | -1.22577 | -0.43063 |
| H | 2.79483  | -5.54313 | -0.3749  | C | 2.47112  | -2.06835 | -1.55239 |
| C | 1.31795  | -5.33152 | -1.94413 | H | 1.55043  | -2.33503 | -2.0624  |
| H | 1.57616  | -6.27098 | -2.4253  | C | 3.69656  | -2.54645 | -1.99118 |
| C | 0.28956  | -4.53484 | -2.49765 | H | 3.76153  | -3.19708 | -2.85757 |
| H | -0.2212  | -4.87661 | -3.39372 | C | 4.90542  | -2.20277 | -1.33091 |
| C | -0.07961 | -3.32299 | -1.92202 | C | 4.90763  | -1.37175 | -0.21463 |
| H | -0.86845 | -2.70938 | -2.34616 | H | 5.81818  | -1.09594 | 0.30334  |
| C | 0.61058  | -2.91714 | -0.77052 | C | 3.66477  | -0.88478 | 0.23703  |
| C | 3.18308  | 0.15102  | -0.89764 | C | 7.28462  | -2.44982 | -1.29031 |
| C | 4.34539  | -0.39254 | -0.32997 | H | 7.33251  | -2.80064 | -0.25142 |
| H | 4.51724  | -0.32521 | 0.73971  | H | 7.49098  | -1.37206 | -1.30984 |
| C | 5.28147  | -1.03459 | -1.14176 | H | 8.04013  | -2.97128 | -1.88036 |
| H | 6.17792  | -1.45713 | -0.69859 | C | -0.94594 | 3.83617  | 0.03693  |
| C | 5.05966  | -1.14236 | -2.51668 | C | -0.36367 | 5.11298  | 0.01339  |
| H | 5.78814  | -1.6463  | -3.14484 | H | 0.71579  | 5.22328  | 0.00612  |
| C | 3.89878  | -0.61035 | -3.08367 | C | -1.17171 | 6.25018  | -0.01102 |
| H | 3.72139  | -0.70154 | -4.15088 | H | -0.71422 | 7.23452  | -0.03268 |
| C | 2.96104  | 0.03606  | -2.27863 | C | -2.5627  | 6.12216  | -0.01457 |
| H | 2.05355  | 0.44349  | -2.71257 | H | -3.18913 | 7.00893  | -0.03636 |
| C | 2.55439  | 2.8023   | 0.17002  | C | -3.14793 | 4.85386  | 0.00498  |
| C | 3.91449  | 3.13165  | 0.06628  | H | -4.22879 | 4.75117  | -0.00204 |
| H | 4.65616  | 2.3551   | -0.08936 | C | -2.34487 | 3.71313  | 0.03006  |
| C | 4.31969  | 4.4642   | 0.15283  | H | -2.8005  | 2.729    | 0.03614  |
| H | 5.37327  | 4.71219  | 0.06833  | C | 1.63039  | 2.70407  | -0.74912 |
| C | 3.37365  | 5.47438  | 0.34097  | C | 1.71207  | 2.46216  | -2.1294  |
| H | 3.6921   | 6.51054  | 0.40565  | H | 0.87673  | 1.99799  | -2.64376 |
| C | 2.01779  | 5.15278  | 0.44147  | C | 2.86755  | 2.80588  | -2.8308  |

|           |    |          |          |          |           |    |          |          |          |
|-----------|----|----------|----------|----------|-----------|----|----------|----------|----------|
|           | H  | 1.27975  | 5.93624  | 0.5839   |           | H  | 2.92833  | 2.61233  | -3.89738 |
|           | C  | 1.60688  | 3.82247  | 0.35601  |           | C  | 3.94415  | 3.39265  | -2.16093 |
|           | H  | 0.55326  | 3.5751   | 0.42661  |           | H  | 4.84352  | 3.65881  | -2.70826 |
|           |    |          |          |          |           | C  | 3.86878  | 3.63061  | -0.78657 |
|           |    |          |          |          |           | H  | 4.70857  | 4.07691  | -0.26296 |
|           |    |          |          |          |           | C  | 2.71676  | 3.28599  | -0.07816 |
|           |    |          |          |          |           | H  | 2.67182  | 3.46107  | 0.99209  |
| <b>7a</b> | Pt | -0.52498 | -1.02272 | 0.03885  | <b>8a</b> | Pt | -0.73572 | -0.87487 | -0.09482 |
|           | S  | -3.65    | -4.27593 | -0.37478 |           | S  | -5.05035 | -2.26272 | -0.11639 |
|           | P  | -0.87323 | 2.2925   | 0.06343  |           | P  | 0.50869  | 2.20116  | 0.08998  |
|           | F  | 6.76197  | -0.53081 | -2.51937 |           | O  | -0.49901 | 1.2845   | -0.63307 |
|           | F  | 7.00368  | -2.08924 | -1.03347 |           | O  | 5.72141  | -2.1832  | -0.05782 |
|           | F  | 7.42182  | -0.01983 | -0.50773 |           | N  | -2.8095  | -0.97716 | -0.32659 |
|           | O  | -1.23557 | 0.98613  | -0.6697  |           | N  | 1.29795  | -0.93564 | 0.07085  |
|           | N  | -2.25176 | -2.09512 | -0.43572 |           | N  | 3.37902  | -0.80634 | 0.99521  |
|           | N  | 1.25326  | -0.11361 | 0.46937  |           | C  | -1.04667 | -2.73607 | 0.5385   |
|           | N  | 2.85873  | 1.01701  | 1.63514  |           | C  | -0.09981 | -3.65549 | 1.01256  |
|           | C  | 6.57259  | -0.81051 | -1.20277 |           | H  | 0.95206  | -3.39472 | 1.01683  |
|           | C  | -2.26639 | 3.45032  | -0.1383  |           | C  | -0.49084 | -4.91548 | 1.47637  |
|           | C  | -0.03557 | -2.79171 | 0.81111  |           | H  | 0.26603  | -5.60835 | 1.83489  |
|           | C  | -3.56944 | 2.9257   | -0.16477 |           | C  | -1.83773 | -5.29927 | 1.48641  |
|           | H  | -3.72338 | 1.85561  | -0.07692 |           | H  | -2.12661 | -6.28072 | 1.84889  |
|           | C  | -3.72898 | -0.58427 | -1.77065 |           | C  | -2.80349 | -4.40956 | 1.0295   |
|           | H  | -3.02237 | 0.2356   | -1.72828 |           | H  | -3.85303 | -4.69295 | 1.03484  |
|           | C  | -4.94698 | -0.48022 | -2.43488 |           | C  | -2.41108 | -3.14475 | 0.56358  |
|           | H  | -5.204   | 0.45192  | -2.92843 |           | C  | -3.31789 | -2.13671 | 0.06587  |
|           | C  | -4.32068 | -2.87898 | -1.20576 |           | C  | -3.77238 | -0.10929 | -0.83497 |
|           | C  | -3.41522 | -1.79681 | -1.14061 |           | C  | -3.55242 | 1.16512  | -1.37645 |
|           | C  | -5.54345 | -2.77111 | -1.87003 |           | H  | -2.54321 | 1.55597  | -1.42267 |
|           | H  | -6.23244 | -3.60801 | -1.9129  |           | C  | -4.64871 | 1.88416  | -1.84196 |
|           | C  | 0.74674  | 1.33118  | 3.74253  |           | H  | -4.49429 | 2.87223  | -2.26439 |
|           | H  | 1.62617  | 0.81631  | 4.11382  |           | C  | -5.94957 | 1.3557   | -1.77962 |
|           | C  | -2.07411 | 4.83398  | -0.26883 |           | H  | -6.78697 | 1.9391   | -2.14908 |
|           | H  | -1.07277 | 5.25142  | -0.26264 |           | C  | -6.1796  | 0.08539  | -1.25596 |
|           | C  | 1.9743   | 3.43314  | -2.62028 |           | H  | -7.18085 | -0.33009 | -1.2157  |
|           | H  | 2.21084  | 3.20548  | -3.65512 |           | C  | -5.08099 | -0.63921 | -0.79118 |
|           | C  | -1.04439 | -3.79214 | 0.7095   |           | C  | 0.89833  | 1.70147  | 1.8056   |
|           | C  | -3.17293 | 5.68122  | -0.41862 |           | C  | 0.50241  | 2.53701  | 2.86355  |
|           | H  | -3.01685 | 6.75047  | -0.52323 |           | H  | -0.05625 | 3.44235  | 2.6573   |
|           | C  | -4.46649 | 5.15507  | -0.44043 |           | C  | 0.83032  | 2.23007  | 4.18368  |
|           | H  | -5.31932 | 5.81666  | -0.55952 |           | H  | 0.51046  | 2.88798  | 4.98555  |
|           | C  | -2.22326 | -3.34498 | 0.005    |           | C  | 1.58053  | 1.08728  | 4.46086  |
|           | C  | 1.30343  | -4.4214  | 2.03163  |           | H  | 1.85317  | 0.84616  | 5.48395  |
|           | H  | 2.22643  | -4.66438 | 2.55152  |           | C  | 1.97817  | 0.24758  | 3.4224   |

|           |          |          |          |          |           |          |          |          |          |
|-----------|----------|----------|----------|----------|-----------|----------|----------|----------|----------|
| C         | -0.58555 | 2.08423  | 1.85728  | H        | 2.56138   | -0.64337 | 3.62829  |          |          |
| C         | 0.30076  | -5.39184 | 1.91531  | C        | 1.63248   | 0.52088  | 2.09076  |          |          |
| H         | 0.44144  | -6.38073 | 2.33989  | C        | 2.10609   | -0.4155  | 1.05099  |          |          |
| C         | 1.56037  | 0.75626  | 1.48702  | C        | 2.1375    | -1.71677 | -0.70104 |          |          |
| C         | -1.28207 | 2.57749  | 4.13955  | C        | 1.89556   | -2.49318 | -1.84863 |          |          |
| H         | -1.99342 | 3.03314  | 4.82105  | H        | 0.90545   | -2.5563  | -2.28745 |          |          |
| C         | -0.15674 | 1.91522  | 4.62892  | C        | 2.98207   | -3.16482 | -2.38822 |          |          |
| H         | 0.01866  | 1.85054  | 5.69847  | H        | 2.8463    | -3.77322 | -3.27826 |          |          |
| C         | -5.8484  | -1.55759 | -2.48238 | C        | 4.27772   | -3.08755 | -1.82155 |          |          |
| H         | -6.79216 | -1.44814 | -3.00717 | H        | 5.08509   | -3.63621 | -2.29183 |          |          |
| C         | 2.45012  | 4.63804  | -0.57428 | C        | 4.51429   | -2.32138 | -0.68173 |          |          |
| H         | 3.05733  | 5.34544  | -0.0181  | C        | 3.42245   | -1.62542 | -0.11101 |          |          |
| C         | 0.59189  | 3.08627  | -0.66097 | C        | 6.83514   | -2.87079 | -0.61354 |          |          |
| C         | 3.4583   | 0.28688  | 0.63304  | H        | 7.04373   | -2.53818 | -1.63796 |          |          |
| C         | 4.81228  | 0.17914  | 0.28667  | H        | 6.67796   | -3.95653 | -0.61629 |          |          |
| H         | 5.57333  | 0.71649  | 0.84098  | H        | 7.68788   | -2.63179 | 0.02366  |          |          |
| C         | 2.46844  | -0.42007 | -0.10372 | C        | 2.06704   | 2.33998  | -0.83388 |          |          |
| C         | 5.1433   | -0.63726 | -0.79032 | C        | 3.27641   | 2.69529  | -0.21713 |          |          |
| C         | 2.81079  | -1.24375 | -1.18692 | H        | 3.32395   | 2.8367   | 0.85802  |          |          |
| H         | 2.05037  | -1.77937 | -1.74571 | C        | 4.42925   | 2.85638  | -0.98697 |          |          |
| C         | 0.89719  | 2.79964  | -2.00054 | H        | 5.36402   | 3.12652  | -0.5056  |          |          |
| H         | 0.29814  | 2.0774   | -2.54571 | C        | 4.38187   | 2.66032  | -2.36916 |          |          |
| C         | 4.15358  | -1.34138 | -1.52017 | H        | 5.28169   | 2.78274  | -2.96466 |          |          |
| H         | 4.45552  | -1.96328 | -2.35698 | C        | 3.18094   | 2.29984  | -2.98563 |          |          |
| C         | 2.74777  | 4.35424  | -1.90938 | H        | 3.14486   | 2.13985  | -4.05887 |          |          |
| H         | 3.58633  | 4.84591  | -2.39341 | C        | 2.02435   | 2.14038  | -2.22264 |          |          |
| C         | 1.37679  | 4.00437  | 0.05331  | H        | 1.09126   | 1.85401  | -2.69703 |          |          |
| H         | 1.15991  | 4.21855  | 1.0952   | C        | -0.21555  | 3.87331  | 0.16622  |          |          |
| C         | -4.66376 | 3.77759  | -0.31416 | C        | 0.57136   | 5.03137  | 0.07512  |          |          |
| H         | -5.668   | 3.36557  | -0.3351  | H        | 1.64509   | 4.95528  | -0.06123 |          |          |
| C         | 1.13956  | -3.14182 | 1.49122  | C        | -0.02561  | 6.2906   | 0.15103  |          |          |
| H         | 1.93897  | -2.41851 | 1.60195  | H        | 0.5892    | 7.1823   | 0.07653  |          |          |
| C         | 0.54323  | 1.3851   | 2.35658  | C        | -1.40793  | 6.40264  | 0.31618  |          |          |
| C         | -0.87996 | -5.07604 | 1.25234  | H        | -1.86987  | 7.38376  | 0.37335  |          |          |
| H         | -1.66885 | -5.81817 | 1.15865  | C        | -2.19713  | 5.25297  | 0.40328  |          |          |
| C         | -1.48658 | 2.66798  | 2.76287  | H        | -3.27251  | 5.33682  | 0.52721  |          |          |
| H         | -2.34987 | 3.20863  | 2.39299  | C        | -1.60596  | 3.99174  | 0.32787  |          |          |
|           |          |          |          | H        | -2.22159  | 3.10072  | 0.38694  |          |          |
| <b>5b</b> | Pt       | 0.28307  | 0.44337  | 0.07703  | <b>6b</b> | Pt       | 0.20675  | 0.66484  | -0.05713 |
|           | P        | -1.92547 | -0.06853 | -0.17068 |           | P        | 1.92621  | -0.81738 | 0.15438  |
|           | N        | 2.36947  | 0.97617  | -0.15583 |           | N        | -1.34273 | 2.15468  | 0.20543  |
|           | N        | 0.50081  | -1.70006 | -0.00434 |           | N        | -0.98778 | -1.08372 | 0.31584  |
|           | C        | 0.22178  | 2.41577  | 0.59119  |           | C        | 1.13512  | 2.30539  | -0.83399 |
|           | C        | -2.0657  | -1.23021 | -1.59932 |           | C        | -0.9864  | 3.32751  | -0.28659 |

---

|   |          |          |          |   |          |          |          |
|---|----------|----------|----------|---|----------|----------|----------|
| C | -2.67931 | -0.93119 | 1.26079  | C | 1.64642  | -1.76553 | 1.71359  |
| C | -3.06238 | 1.30663  | -0.60279 | C | 2.04526  | -2.06736 | -1.18219 |
| C | 2.59534  | 2.23618  | 0.16972  | C | 3.61059  | -0.11478 | 0.35621  |
| C | 3.48748  | 0.35249  | -0.70718 | C | -2.55558 | 2.20233  | 0.89033  |
| C | -0.13405 | -2.65214 | -0.7528  | C | -0.80758 | -2.14395 | 1.1563   |
| C | 1.32496  | -2.41935 | 0.83952  | C | -2.15056 | -1.38375 | -0.37044 |
| C | -0.85519 | 3.1742   | 1.07683  | C | 2.38361  | 2.40272  | -1.4689  |
| C | 1.49706  | 3.05351  | 0.63865  | C | 0.30928  | 3.46615  | -0.91618 |
| C | -3.08167 | -1.04683 | -2.55138 | S | -2.15334 | 4.60578  | -0.02697 |
| C | -1.19142 | -2.33897 | -1.72789 | C | 2.72102  | -2.00874 | 2.58445  |
| C | -3.70081 | -1.87948 | 1.09528  | C | 0.36954  | -2.29811 | 2.02534  |
| C | -2.22893 | -0.61821 | 2.55285  | C | 2.53154  | -3.36115 | -0.9366  |
| C | -4.29076 | 1.49359  | 0.04577  | C | 1.6565   | -1.71042 | -2.4828  |
| C | -2.68033 | 2.19316  | -1.62474 | C | 4.7133   | -0.59319 | -0.36461 |
| S | 4.24141  | 2.76834  | -0.09481 | C | 3.78888  | 0.93851  | 1.27006  |
| C | 4.63258  | 1.18026  | -0.73652 | C | -3.17019 | 3.47443  | 0.85261  |
| C | 3.55851  | -0.94468 | -1.23503 | C | -3.16671 | 1.15967  | 1.60141  |
| N | 0.23621  | -3.91446 | -0.50627 | N | -1.76874 | -3.07929 | 1.1094   |
| C | 1.16147  | -3.79431 | 0.50449  | C | -2.62964 | -2.61813 | 0.14435  |
| C | 2.20087  | -2.01828 | 1.86     | C | -2.84804 | -0.71082 | -1.38612 |
| H | -1.85367 | 2.75437  | 1.09011  | H | 3.06253  | 1.55871  | -1.46488 |
| C | -0.68764 | 4.47889  | 1.55311  | C | 2.79536  | 3.57028  | -2.12025 |
| C | 1.67062  | 4.36529  | 1.10918  | C | 0.7196   | 4.64337  | -1.56285 |
| H | -3.76217 | -0.209   | -2.45975 | H | 3.70275  | -1.61361 | 2.35272  |
| C | -3.2418  | -1.93227 | -3.61718 | C | 2.55382  | -2.76157 | 3.74662  |
| C | -1.37664 | -3.22508 | -2.80235 | C | 0.22582  | -3.06491 | 3.19456  |
| H | -4.04981 | -2.13809 | 0.10061  | H | 2.8248   | -3.65301 | 0.06683  |
| C | -4.26568 | -2.50072 | 2.21016  | C | 2.63144  | -4.28109 | -1.98134 |
| C | -2.79979 | -1.23927 | 3.66438  | C | 1.7616   | -2.63296 | -3.52458 |
| H | -1.42733 | 0.10276  | 2.68251  | H | 1.26512  | -0.71547 | -2.67306 |
| H | -4.60004 | 0.81938  | 0.83689  | H | 4.59302  | -1.40433 | -1.07427 |
| C | -5.12548 | 2.55224  | -0.32397 | C | 5.97648  | -0.02556 | -0.17354 |
| C | -3.52025 | 3.24043  | -1.99682 | C | 5.0515   | 1.49407  | 1.46461  |
| H | -1.72359 | 2.06488  | -2.12237 | H | 2.93741  | 1.32538  | 1.82213  |
| C | 5.85169  | 0.73207  | -1.24739 | C | -4.39458 | 3.71867  | 1.47674  |
| C | 4.77083  | -1.38768 | -1.75235 | C | -4.38194 | 1.40599  | 2.23082  |
| H | 2.67864  | -1.57367 | -1.23629 | H | -2.68867 | 0.19075  | 1.65239  |
| C | 1.88642  | -4.78305 | 1.19211  | C | -3.81799 | -3.19796 | -0.34459 |
| C | 2.9067   | -3.01225 | 2.53136  | C | -4.01452 | -1.28804 | -1.86563 |
| H | 2.31833  | -0.9708  | 2.1204   | H | -2.48736 | 0.22981  | -1.79112 |
| H | -1.55199 | 5.02746  | 1.91843  | H | 3.77131  | 3.59756  | -2.59806 |
| C | 0.57232  | 5.08523  | 1.56458  | C | 1.97106  | 4.69892  | -2.16505 |
| H | 2.66038  | 4.81478  | 1.12878  | H | 0.05875  | 5.50569  | -1.60441 |
| H | -4.03419 | -1.76626 | -4.34044 | H | 3.40059  | -2.93237 | 4.40418  |

---

|           |          |          |          |          |           |          |          |          |          |
|-----------|----------|----------|----------|----------|-----------|----------|----------|----------|----------|
| C         | -2.38467 | -3.02632 | -3.74076 | C        | 1.2994    | -3.29247 | 4.04985  |          |          |
| H         | -0.70887 | -4.0757  | -2.87883 | H        | -0.75251  | -3.47855 | 3.41167  |          |          |
| H         | -5.05171 | -3.23739 | 2.07442  | H        | 3.00376   | -5.28157 | -1.78284 |          |          |
| C         | -3.81735 | -2.18095 | 3.49403  | C        | 2.24807   | -3.91829 | -3.27479 |          |          |
| H         | -2.44391 | -0.9937  | 4.66035  | H        | 1.45608   | -2.34991 | -4.52729 |          |          |
| H         | -6.07332 | 2.69107  | 0.18718  | H        | 6.82367   | -0.40025 | -0.73998 |          |          |
| C         | -4.74385 | 3.42358  | -1.34438 | C        | 6.14766   | 1.01474  | 0.73999  |          |          |
| H         | -3.21751 | 3.9178   | -2.78953 | H        | 5.17908   | 2.30557  | 2.1746   |          |          |
| H         | 6.72364  | 1.37727  | -1.25972 | H        | -4.85773  | 4.69885  | 1.43596  |          |          |
| C         | 5.90954  | -0.5643  | -1.75295 | C        | -4.99658  | 2.66791  | 2.16457  |          |          |
| H         | 4.83634  | -2.38991 | -2.16388 | H        | -4.86345  | 0.60602  | 2.78428  |          |          |
| H         | 1.7627   | -5.83254 | 0.93926  | H        | -4.16693  | -4.1405  | 0.05973  |          |          |
| C         | 2.75404  | -4.37819 | 2.20036  | C        | -4.4992   | -2.51845 | -1.34958 |          |          |
| H         | 3.58878  | -2.73398 | 3.33021  | H        | -4.58757  | -0.81025 | -2.65412 |          |          |
| H         | 0.69503  | 6.09938  | 1.93139  | H        | 2.29742   | 5.60287  | -2.66954 |          |          |
| H         | -2.49994 | -3.72295 | -4.56586 | H        | 1.15665   | -3.88135 | 4.95114  |          |          |
| H         | -4.2559  | -2.66922 | 4.35921  | H        | 2.32282   | -4.63773 | -4.08479 |          |          |
| H         | -5.39449 | 4.24452  | -1.63057 | H        | 7.12993   | 1.45375  | 0.88699  |          |          |
| H         | 6.84416  | -0.93692 | -2.16008 | H        | -5.94729  | 2.83137  | 2.66207  |          |          |
| H         | 3.32421  | -5.12238 | 2.74983  | O        | -5.66727  | -2.95591 | -1.92731 |          |          |
|           |          |          |          | C        | -6.21471  | -4.18164 | -1.46457 |          |          |
|           |          |          |          | H        | -6.46525  | -4.13577 | -0.39695 |          |          |
|           |          |          |          | H        | -5.52704  | -5.02075 | -1.63067 |          |          |
|           |          |          |          | H        | -7.12689  | -4.34542 | -2.04075 |          |          |
| <b>7b</b> | Pt       | 0.5834   | 0.6757   | -0.0289  | <b>8b</b> | Pt       | -0.14936 | 0.48754  | 0.01547  |
|           | P        | 2.00685  | -1.09875 | 0.12752  |           | P        | 2.03357  | -0.12592 | -0.15285 |
|           | N        | -0.62707 | 2.44525  | 0.25405  |           | N        | -2.18047 | 1.15272  | -0.37078 |
|           | N        | -0.88917 | -0.79626 | 0.5422   |           | N        | -0.47031 | -1.64537 | -0.16724 |
|           | C        | 1.72915  | 2.06195  | -0.98655 |           | C        | -0.01013 | 2.44432  | 0.56318  |
|           | C        | -0.10362 | 3.5013   | -0.34248 |           | C        | -2.34689 | 2.42313  | -0.05783 |
|           | C        | 1.69192  | -1.91416 | 1.75493  |           | C        | 2.16017  | -1.1659  | -1.67476 |
|           | C        | 1.76718  | -2.39892 | -1.14263 |           | C        | 2.67382  | -1.15794 | 1.22118  |
|           | C        | 3.80388  | -0.72662 | 0.1586   |           | C        | 3.27662  | 1.20011  | -0.41838 |
|           | C        | -1.74086 | 2.76032  | 1.03033  |           | C        | -3.30843 | 0.59077  | -0.96314 |
|           | C        | -0.82927 | -1.85003 | 1.4143   |           | C        | 0.11809  | -2.53937 | -1.017   |
|           | C        | -2.13359 | -0.90222 | -0.03782 |           | C        | -1.3494  | -2.41354 | 0.57559  |
|           | C        | 2.91069  | 1.88275  | -1.72291 |           | C        | 1.06407  | 3.12085  | 1.1627   |
|           | C        | 1.13224  | 3.35448  | -1.0808  |           | C        | -1.23669 | 3.16882  | 0.49646  |
|           | S        | -0.98094 | 4.99149  | -0.07634 |           | S        | -3.94365 | 3.05383  | -0.40714 |
|           | C        | 2.77473  | -2.32058 | 2.55113  |           | C        | 3.21804  | -0.96519 | -2.57603 |
|           | C        | 0.3725   | -2.18337 | 2.1977   |           | C        | 1.21794  | -2.19306 | -1.93396 |
|           | C        | 2.01422  | -3.7526  | -0.86496 |           | C        | 3.68088  | -2.11367 | 1.01326  |
|           | C        | 1.34327  | -2.02251 | -2.42682 |           | C        | 2.15526  | -0.97006 | 2.51158  |
|           | C        | 4.73059  | -1.44627 | -0.60804 |           | C        | 4.46901  | 1.2669   | 0.31511  |

---

|   |          |          |          |   |          |          |          |
|---|----------|----------|----------|---|----------|----------|----------|
| C | 4.25509  | 0.31524  | 0.98755  | C | 3.01508  | 2.17529  | -1.39692 |
| C | -2.10654 | 4.12344  | 0.95642  | C | -4.39913 | 1.48566  | -1.05491 |
| C | -2.46834 | 1.8932   | 1.85808  | C | -3.43642 | -0.70775 | -1.47658 |
| N | -1.93578 | -2.59792 | 1.48413  | N | -0.33216 | -3.79644 | -0.92494 |
| C | -2.78009 | -2.01812 | 0.56855  | C | -1.26443 | -3.74415 | 0.08197  |
| C | -2.7738  | -0.14364 | -1.03107 | C | -2.22066 | -2.10214 | 1.64428  |
| H | 3.41676  | 0.92514  | -1.71613 | H | 2.02277  | 2.6287   | 1.27281  |
| C | 3.47416  | 2.91427  | -2.48174 | C | 0.94379  | 4.43299  | 1.63262  |
| C | 1.69672  | 4.39545  | -1.83559 | C | -1.36142 | 4.48899  | 0.9587   |
| H | 3.78858  | -2.12959 | 2.22093  | H | 3.9507   | -0.19089 | -2.38368 |
| C | 2.57314  | -2.97827 | 3.76469  | C | 3.35301  | -1.75133 | -3.72039 |
| C | 0.19068  | -2.85766 | 3.41641  | C | 1.3775   | -2.97978 | -3.08729 |
| H | 2.33131  | -4.05779 | 0.12718  | H | 4.08125  | -2.277   | 0.01759  |
| C | 1.84432  | -4.71351 | -1.86274 | C | 4.16605  | -2.86384 | 2.08536  |
| C | 1.17862  | -2.98688 | -3.42185 | C | 2.64623  | -1.72036 | 3.58107  |
| H | 1.13642  | -0.97806 | -2.64003 | H | 1.3624   | -0.24577 | 2.67222  |
| H | 4.39875  | -2.25197 | -1.25363 | H | 4.68666  | 0.52399  | 1.07441  |
| C | 6.09028  | -1.12779 | -0.54548 | C | 5.38691  | 2.29301  | 0.07177  |
| C | 5.61234  | 0.62201  | 1.05428  | C | 3.93752  | 3.18954  | -1.64354 |
| H | 3.54174  | 0.88806  | 1.57272  | H | 2.08685  | 2.1412   | -1.95941 |
| C | -3.19994 | 4.6309   | 1.65989  | C | -5.61837 | 1.10516  | -1.61754 |
| C | -3.55246 | 2.40094  | 2.5655   | C | -4.64968 | -1.08498 | -2.0421  |
| H | -2.17619 | 0.85488  | 1.93948  | H | -2.59837 | -1.38946 | -1.42944 |
| C | -4.08029 | -2.38063 | 0.18971  | C | -2.05194 | -4.77834 | 0.6267   |
| C | -4.0586  | -0.51542 | -1.40016 | O | -2.23506 | -0.80929 | 2.09103  |
| H | -2.28096 | 0.70018  | -1.50268 | C | -2.99242 | -3.13385 | 2.17603  |
| H | 4.39058  | 2.72788  | -3.03564 | H | 1.80417  | 4.91658  | 2.08805  |
| C | 2.87671  | 4.17716  | -2.53697 | C | -0.26416 | 5.12881  | 1.5235   |
| H | 1.2089   | 5.3659   | -1.88233 | H | -2.3146  | 5.00722  | 0.88813  |
| H | 3.42831  | -3.27885 | 4.36205  | H | 4.179    | -1.57286 | -4.40196 |
| C | 1.27462  | -3.24793 | 4.19721  | C | 2.42622  | -2.76236 | -3.97568 |
| H | -0.82419 | -3.06908 | 3.73357  | H | 0.65812  | -3.7713  | -3.26379 |
| H | 2.03229  | -5.75932 | -1.63944 | H | 4.94186  | -3.60445 | 1.91617  |
| C | 1.42798  | -4.33218 | -3.14058 | C | 3.65112  | -2.667   | 3.36916  |
| H | 0.84814  | -2.68797 | -4.41194 | H | 2.23812  | -1.57057 | 4.57604  |
| H | 6.80011  | -1.68802 | -1.14647 | H | 6.30606  | 2.33744  | 0.64813  |
| C | 6.5324   | -0.09759 | 0.28483  | C | 5.12492  | 3.25184  | -0.90689 |
| H | 5.95136  | 1.42684  | 1.69937  | H | 3.72718  | 3.93529  | -2.40416 |
| H | -3.47149 | 5.67884  | 1.59105  | H | -6.44736 | 1.80221  | -1.67878 |
| C | -3.92261 | 3.75268  | 2.46365  | C | -5.73377 | -0.19351 | -2.10752 |
| H | -4.12201 | 1.73849  | 3.20956  | H | -4.75845 | -2.08844 | -2.44138 |
| H | -4.57692 | -3.22956 | 0.64598  | H | -1.97834 | -5.79087 | 0.24191  |
| C | -4.70529 | -1.62089 | -0.79454 | C | -2.90668 | -4.45169 | 1.66552  |
| H | -4.57833 | 0.04333  | -2.17201 | C | -3.10302 | -0.48146 | 3.16921  |

---



|   |          |          |          |   |          |          |          |
|---|----------|----------|----------|---|----------|----------|----------|
| H | 3.32067  | 4.97411  | -3.12503 | H | -3.6683  | -2.93726 | 2.99956  |
| H | 1.10535  | -3.76014 | 5.13961  | H | -0.34978 | 6.14888  | 1.88452  |
| H | 1.29254  | -5.08284 | -3.9135  | H | 2.51939  | -3.381   | -4.86341 |
| H | 7.58922  | 0.14748  | 0.33202  | H | 4.02798  | -3.25479 | 4.20091  |
| H | -4.7754  | 4.12173  | 3.02449  | H | 5.84024  | 4.04683  | -1.09546 |
| C | -6.10526 | -1.93679 | -1.22133 | H | -6.67039 | -0.51485 | -2.55209 |
| F | -6.99306 | -0.98859 | -0.81575 | H | -3.52976 | -5.21941 | 2.11622  |
| F | -6.22685 | -1.9986  | -2.57336 | H | -4.15266 | -0.66609 | 2.91054  |
| F | -6.55184 | -3.11653 | -0.73212 | H | -2.95905 | 0.58303  | 3.35833  |
|   |          |          |          | H | -2.8517  | -1.0485  | 4.07389  |

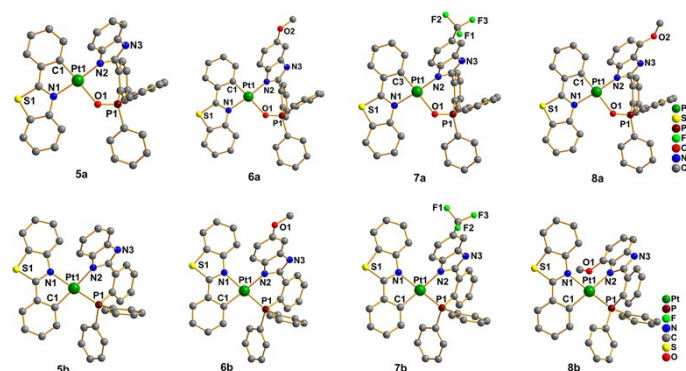

**Fig. S5** The optimized structures of the complexes in the ground state ( $S_0$ ). Hydrogen atoms are omitted for clarity.

**Table S7.** UV/Vis absorption data of the complexes in DCM ( $10^{-5}$  M) at 298K.

| complex   | $\lambda_{\text{abs}}/\text{nm}$ ( $\epsilon \times 10^4 / \text{M}^{-1} \text{cm}^{-1}$ ) |
|-----------|--------------------------------------------------------------------------------------------|
| <b>5a</b> | 230 / 4.49, 268 / 2.87, 320 / 2.34, 401 / 0.53                                             |
| <b>6a</b> | 230 / 4.16, 269 / 2.91, 322 / 2.39, 408 / 0.58                                             |
| <b>7a</b> | 230 / 4.60, 266 / 2.87, 319 / 2.25, 378 / 0.51, 408 / 0.40                                 |
| <b>8a</b> | 230 / 4.49, 267 / 2.90, 321 / 2.34, 407 / 0.49                                             |
| <b>5b</b> | 229 / 4.91, 319 / 2.33, 396 / 0.26                                                         |
| <b>6b</b> | 229 / 5.87, 320 / 2.59, 404 / 0.38                                                         |
| <b>7b</b> | 229 / 5.10, 315 / 2.28, 399 / 0.26                                                         |
| <b>8b</b> | 229 / 5.24, 317 / 2.31, 401 / 0.19                                                         |

**Table S8.** Calculated energies (eV) and energy gaps of HOMO and LUMO orbitals of complexes.

| complex    | <b>5a</b> | <b>6a</b> | <b>7a</b> | <b>8a</b> |
|------------|-----------|-----------|-----------|-----------|
| HOMO       | -5.499    | -5.140    | -5.777    | -5.141    |
| LUMO       | -1.975    | -1.969    | -2.008    | -1.967    |
| $\Delta E$ | 3.524     | 3.171     | 3.769     | 3.174     |
| complex    | <b>5b</b> | <b>6b</b> | <b>7b</b> | <b>8b</b> |
| HOMO       | -5.441    | -5.071    | -5.687    | -5.128    |
| LUMO       | -1.998    | -1.991    | -2.033    | -1.928    |
| $\Delta E$ | 3.443     | 3.080     | 3.654     | 3.200     |

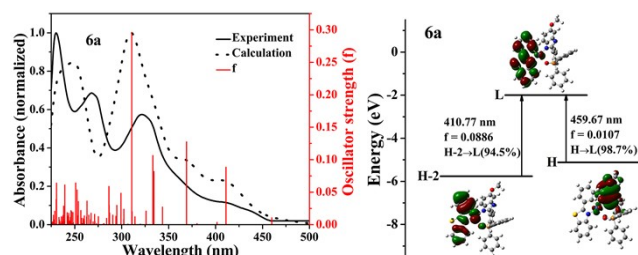

**Fig. S6** Comparisons between the simulated and experimental absorption spectra of the complex **6a** (left). The calculated low-energy transitions for the complex **6a** and the relative frontier molecular orbitals (contributions > 35%) (right).

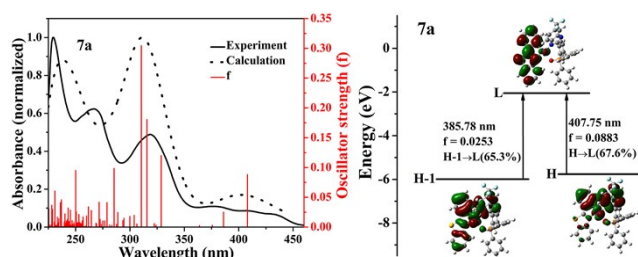

**Fig. S7** Comparisons between the simulated and experimental absorption spectra of the complex **7a** (left). The calculated low-energy transitions for the complex **7a** and the relative frontier molecular orbitals (contributions > 35%) (right).

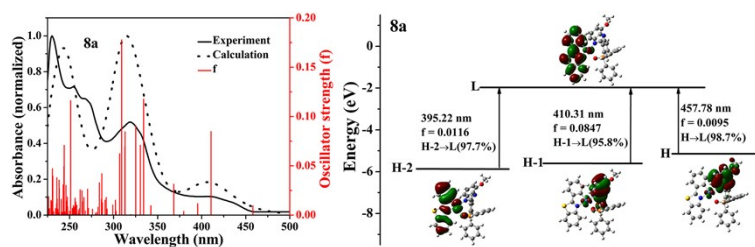

**Fig. S8** Comparisons between the simulated and experimental absorption spectra of the complex **8a** (left). The calculated low-energy transitions for the complex **8a** and the relative frontier molecular orbitals (contributions > 35%) (right).

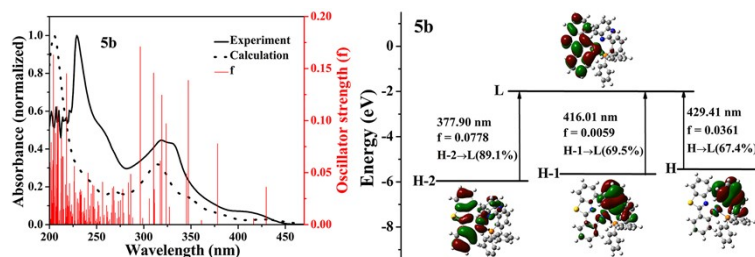

**Fig. S9** Comparisons between the simulated and experimental absorption spectra of the complex **5b** (left). The calculated low-energy transitions for the complex **5b** and the relative frontier molecular orbitals (contributions > 35%) (right).

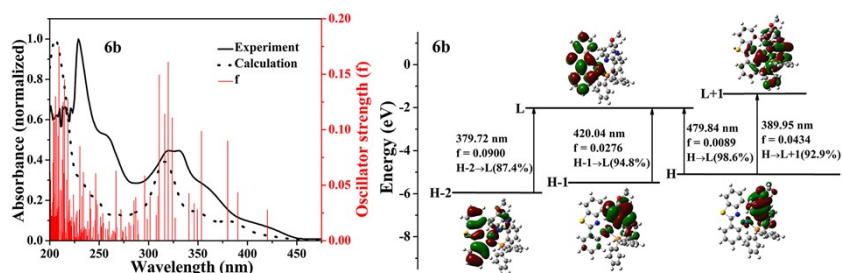

**Fig. S10** Comparisons between the simulated and experimental absorption spectra of the complex **6b** (left). The calculated low-energy transitions for the complex **6b** and the relative frontier molecular orbitals (contributions > 35%) (right).

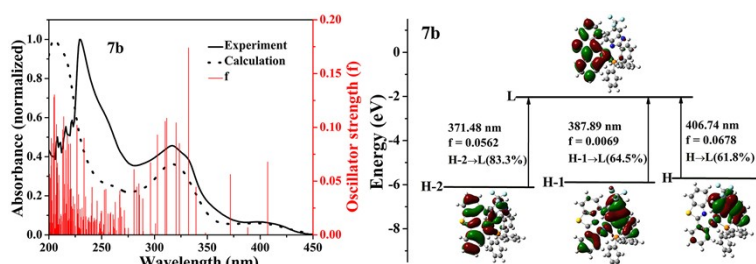

**Fig. S11** Comparisons between the simulated and experimental absorption spectra of the complex **7b** (left). The calculated low-energy transitions for the complex **7b** and the relative frontier molecular orbitals (contributions > 35%) (right).

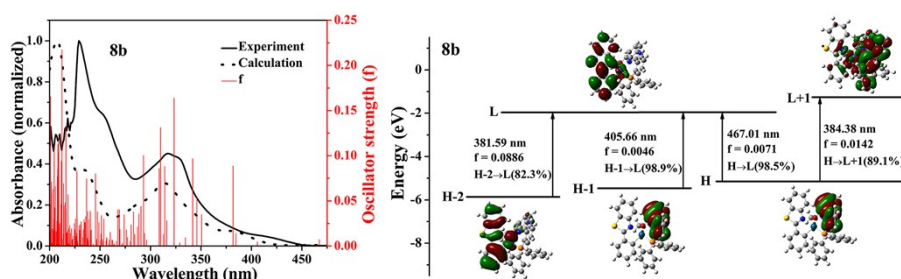

**Fig. S12** Comparisons between the simulated and experimental absorption spectra of the complex **8b** (left). The calculated low-energy transitions for the complex **8b** and the relative frontier molecular orbitals (contributions > 35%) (right).

**Table S9.** Calculated electronic transitions in the range of 300-350 nm for complexes along with the corresponding wavelengths ( $\lambda$ ) and oscillator strengths (f).

| Complex   | $\lambda$ (nm) | f <sup>a</sup> | Contribution <sup>b</sup> | Assignment               |
|-----------|----------------|----------------|---------------------------|--------------------------|
| <b>5a</b> | 331.06         | 0.1019         | H-4 → L (86.2%)           | MLCT, ILCT(bt-localized) |
|           | 330.09         | 0.1823         | H-1 → L+1 (93.2%)         | ILCT(L-localized)        |
|           | 310.42         | 0.2883         | H-5 → L (88.2%)           | MLCT, ILCT(bt-localized) |
| <b>6a</b> | 332.90         | 0.1065         | H-4 → L (62.0%)           | MLCT, ILCT(bt-localized) |
|           | 310.48         | 0.2960         | H-5 → L (88.3%)           | MLCT, ILCT(bt-localized) |
| <b>7a</b> | 328.50         | 0.1202         | H-4 → L (85.7%)           | MLCT, ILCT(bt-localized) |
|           | 315.35         | 0.1805         | H-2 → L+1 (91.4%)         | ILCT(L-localized)        |
|           | 310.23         | 0.3046         | H-5 → L (86.6%)           | MLCT, ILCT(bt-localized) |

|           |        |        |                 |                          |
|-----------|--------|--------|-----------------|--------------------------|
| <b>8a</b> | 333.81 | 0.1177 | H-4→L (85.6%)   | MLCT, ILCT(bt-localized) |
|           | 308.95 | 0.1777 | H-6→L(55.4%)    | MLCT, ILCT(bt-localized) |
| <b>5b</b> | 346.89 | 0.1386 | H→L+1 (67.4%)   | ILCT(L-localized)        |
|           | 318.86 | 0.1246 | H-1→L+2 (31.4%) | ILCT(L-localized)        |
|           | 310.04 | 0.1457 | H-1→L+3 (34.0%) | MLCT, ILCT(L-localized)  |
| <b>6b</b> | 353.10 | 0.0987 | H→L+2 (42.0%)   | ILCT(L-localized)        |
|           |        |        | H-1→L+1 (30.3%) | ILCT(L-localized)        |
|           | 323.60 | 0.1107 | H-4→L (55.7%)   | MLCT, ILCT(bt-localized) |
|           | 319.59 | 0.1609 | H→L+4 (44.3%)   | ILCT(L-localized)        |
|           | 316.08 | 0.1141 | H-1→L+2 (55.3%) | ILCT(L-localized)        |
| <b>7b</b> | 310.52 | 0.1495 | H-5→L (73.7%)   | MLCT, ILCT(bt-localized) |
|           | 331.89 | 0.1739 | H→L+1 (57.1%)   | ILCT(L-localized)        |
|           | 320.09 | 0.1044 | H-4→L (43.8%)   | MLCT, ILCT(bt-localized) |
|           | 311.40 | 0.1086 | H-5→L (45.2%)   | MLCT, ILCT(bt-localized) |
| <b>8b</b> | 309.94 | 0.1056 | H-5→L (38.8%)   | MLCT, ILCT(bt-localized) |
|           | 323.12 | 0.1639 | H-4→L (68.5%)   | MLCT, ILCT(bt-localized) |
|           | 309.69 | 0.1312 | H-5→L (69.1%)   | MLCT, ILCT(bt-localized) |

<sup>a</sup> Oscillator strength ( $f$ )  $\geq 0.1$ . <sup>b</sup> Contribution  $> 25\%$ .

**Table S10.** Calculated low-energy ( $>370$  nm) transitions for the complexes along with their wavelengths ( $\lambda$ ) and Oscillator Strengths ( $f$ ).

| Complex   | $\lambda$ (nm) | $f^a$  | Contribution  | Main assignment  |
|-----------|----------------|--------|---------------|------------------|
| <b>5a</b> | 415.46         | 0.0150 | H→L (93.8%)   | LLCT             |
|           | 409.57         | 0.0914 | H-2→L (94.3%) | MLCT, ILCT       |
| <b>6a</b> | 459.67         | 0.0107 | H→L (98.7%)   | LLCT             |
|           | 410.77         | 0.0886 | H-2→L (94.5%) | MLCT, ILCT       |
| <b>7a</b> | 407.75         | 0.0883 | H→L (67.6%)   | LLCT             |
|           |                |        | H-1→L (28.4%) | MLCT, LLCT, ILCT |
|           | 385.78         | 0.0253 | H-1→L (65.3%) | MLCT, LLCT, ILCT |
| <b>8a</b> | 457.78         | 0.0095 | H→L (98.7%)   | LLCT             |
|           | 410.31         | 0.0847 | H-1→L (95.8%) | LLCT             |
|           | 395.22         | 0.0116 | H-2→L (97.7%) | MLCT             |
| <b>5b</b> | 429.41         | 0.0361 | H→L (67.4%)   | LLCT             |
|           | 416.01         | 0.0059 | H-1→L (69.5%) | LLCT             |
|           | 377.90         | 0.0778 | H-2→L (89.1%) | MLCT, ILCT       |
| <b>6b</b> | 479.84         | 0.0089 | H→L (98.6%)   | LLCT             |
|           | 420.04         | 0.0276 | H-1→L (94.8%) | LLCT             |
|           | 389.95         | 0.0434 | H→L+1 (92.9%) | ILCT             |
|           | 379.72         | 0.0900 | H-2→L (87.4%) | MLCT, ILCT       |
| <b>7b</b> | 406.74         | 0.0678 | H→L (61.8%)   | LLCT             |
|           | 387.89         | 0.0069 | H→L (34.3%)   | LLCT             |
|           |                |        | H-1→L (64.5%) | MLCT, LLCT       |
|           | 371.48         | 0.0562 | H-2→L (83.3%) | MLCT, ILCT       |

|           |        |        |               |            |
|-----------|--------|--------|---------------|------------|
| <b>8b</b> | 467.01 | 0.0071 | H→L (98.5%)   | LLCT       |
|           | 405.66 | 0.0056 | H-1→L (98.9%) | LLCT       |
|           | 384.38 | 0.0142 | H→L+1 (82.9%) | ILCT       |
|           | 381.59 | 0.0886 | H-2→L (82.3%) | MLCT, ILCT |

<sup>a</sup> Oscillator strength (f) ≥ 0.005.

**Table S11.** Compositions of the frontier molecular orbitals involved in the calculated electronic transitions.

| <b>5a</b> |       |       |       |
|-----------|-------|-------|-------|
| Orbital   | Pt    | bt    | OL1   |
| HOMO-5    | 21.5% | 72.9% | 5.6%  |
| HOMO-4    | 42.3% | 49.8% | 7.9%  |
| HOMO-2    | 36.5% | 61.1% | 2.4%  |
| HOMO-1    | 2.4%  | -     | 97.6% |
| HOMO      | 14.6% | 0.9%  | 84.5% |
| LUMO      | 4.4%  | 95.6% | -     |
| LUMO+1    | 1.9%  | 0.7%  | 97.4% |
| <b>6a</b> |       |       |       |
| Orbital   | Pt    | bt    | OL2   |
| HOMO-5    | 21.4% | 72.9% | 5.7%  |
| HOMO-4    | 40.1% | 47.3% | 12.6% |
| HOMO-2    | 46.8% | 50.5% | 2.7%  |
| HOMO      | 5.5%  | -     | 94.5% |
| LUMO      | 4.8%  | 95.2% | -     |
| LUMO+1    | 1.9%  | 0.9%  | 97.2% |
| <b>7a</b> |       |       |       |
| Orbital   | Pt    | bt    | OL3   |
| HOMO-5    | 20.8% | 75.1% | 4.1%  |
| HOMO-4    | 38.5% | 51.8% | 9.7%  |
| HOMO-2    | 7.3%  | 0.5%  | 92.2% |
| HOMO-1    | 37.8% | 36.6% | 25.6% |
| HOMO      | 26.6% | 18.5% | 54.9% |
| LUMO      | 4.4%  | 95.6% | -     |
| LUMO+1    | 1.9%  | 0.3%  | 97.8% |
| <b>8a</b> |       |       |       |
| Orbital   | Pt    | bt    | OL4   |
| HOMO-6    | 38.5% | 47.6% | 13.9% |
| HOMO-4    | 45.1% | 45.9% | 9.0%  |
| HOMO-2    | 36.8% | 60.7% | 2.5%  |
| HOMO-1    | 7.0%  | 0.5%  | 92.5% |
| HOMO      | 3.2%  | 0.6%  | 96.2% |
| LUMO      | 4.9%  | 95.1% | -     |
| LUMO+1    | 2.4%  | 0.3%  | 97.3% |

| <b>5b</b> |       |       |       |
|-----------|-------|-------|-------|
| Orbital   | Pt    | bt    | L1    |
| HOMO-2    | 31.5% | 60.1% | 8.4%  |
| HOMO-1    | 13.0% | 4.2%  | 82.8% |
| HOMO      | 5.6%  | 0.9%  | 93.5% |
| LUMO      | 5.0%  | 93.6% | 1.4%  |
| LUMO+1    | 25.6% | 13.9% | 60.5% |
| LUMO+2    | 15.6% | 5.8%  | 78.6% |
| LUMO+3    | 8.5%  | 0.9%  | 90.6% |

  

| <b>6b</b> |       |       |       |
|-----------|-------|-------|-------|
| Orbital   | Pt    | bt    | L2    |
| HOMO-5    | 22.2% | 76.0% | 1.8%  |
| HOMO-4    | 40.3% | 51.8% | 7.9%  |
| HOMO-2    | 32.6% | 60.3% | 7.1%  |
| HOMO-1    | 9.0%  | 3.7%  | 87.3% |
| HOMO      | 4.7%  | 0.6%  | 94.7% |
| LUMO      | 8.2%  | 88.4% | 3.4%  |
| LUMO+1    | 25.7% | 10.2% | 64.1% |
| LUMO+2    | 10.6% | 5.9%  | 83.5% |
| LUMO+4    | 10.6% | 7.6%  | 81.8% |

  

| <b>7b</b> |       |       |       |
|-----------|-------|-------|-------|
| Orbital   | Pt    | bt    | L3    |
| HOMO-5    | 25.4% | 72.3% | 2.3%  |
| HOMO-4    | 28.4% | 64.0% | 8.6%  |
| HOMO-2    | 28.2% | 51.8% | 20.0% |
| HOMO-1    | 19.7% | 11.5% | 68.8% |
| HOMO      | 8.3%  | 3.5%  | 88.2% |
| LUMO      | 4.7%  | 92.2% | 3.1%  |
| LUMO+1    | 23.4% | 8.6%  | 68.0% |

  

| <b>8b</b> |       |       |       |
|-----------|-------|-------|-------|
| Orbital   | Pt    | bt    | L4    |
| HOMO-5    | 25.8% | 71.4% | 2.8%  |
| HOMO-4    | 38.2% | 52.6% | 9.2%  |
| HOMO-3    | 62.2% | 23.3% | 14.5% |
| HOMO-2    | 37.0% | 58.1% | 4.9%  |
| HOMO-1    | 1.1%  | -     | 98.9% |
| HOMO      | 9.4%  | 2.2%  | 88.4% |
| LUMO      | 4.2%  | 92.6% | 3.2%  |
| LUMO+1    | 25.8% | 10.3% | 63.9% |

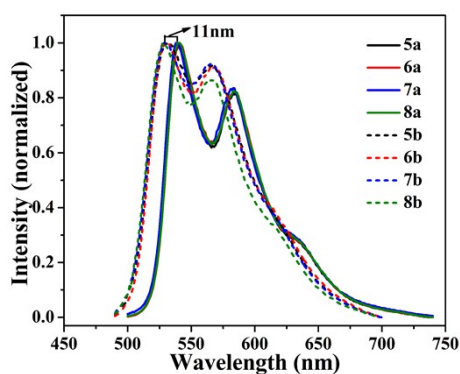

**Fig. S13** The shift in emission spectroscopic relevant unit in DCM ( $10^{-5}$  M) at 298 K between complexes **7a** and **7b**.

**Table S12.** The triplet energy and emission wavelength of the complexes (**5a-5b**) calculated with the B3LYP functional.

| Complex   | Triplet energy (eV) | $\lambda_{em}$ (nm) |
|-----------|---------------------|---------------------|
| <b>5a</b> | 1.8997              | 652.66              |
| <b>6a</b> | 1.8748              | 661.32              |
| <b>7a</b> | 1.9155              | 647.26              |
| <b>8a</b> | 1.8686              | 663.50              |

**Table S13.** Calculated emission results from TD-DFT for the complexes **5a** and **5b**.

| Complex   | State | $\lambda$ (nm) | Contribution                 | Assignment                      | Orbital | Contribution |      |      |
|-----------|-------|----------------|------------------------------|---------------------------------|---------|--------------|------|------|
|           |       |                |                              |                                 |         | Pt           | bt   | L    |
| <b>5a</b> | $T_1$ | 652.66         | H-2→L (81.8%)<br>H→L (9.4%)  | $^3MLCT$ , $^3ILCT$<br>$^3LLCT$ | H-2     | 26.5         | 68.4 | 5.1  |
|           |       |                |                              |                                 | H       | 7.9          | 2.9  | 89.2 |
|           |       |                |                              |                                 | L       | 5.8          | 92.6 | 1.6  |
| <b>5b</b> | $T_1$ | 644.96         | H-2→L (79.5%)<br>H→L (11.5%) | $^3MLCT$ , $^3ILCT$<br>$^3LLCT$ | H-2     | 11.4         | 81.8 | 6.8  |
|           |       |                |                              |                                 | H       | 4.6          | 4.0  | 91.4 |
|           |       |                |                              |                                 | L       | 5.1          | 91.0 | 3.9  |

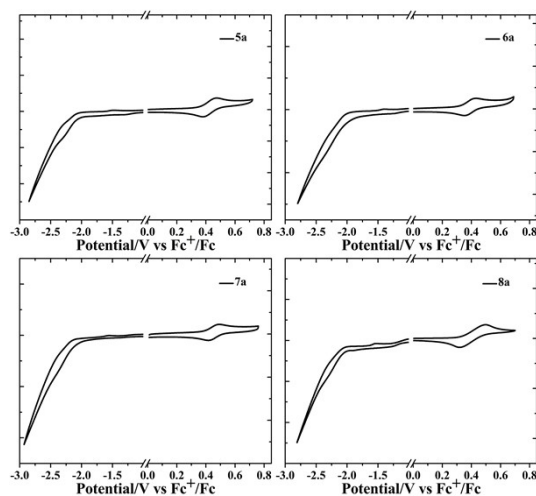

**Fig. S14** Cyclic voltammograms of complexes **5a-8a** in  $CH_2Cl_2$  solution in the presence of  $[Bu_4N][PF_6]$  (0.1 M) at 298K.

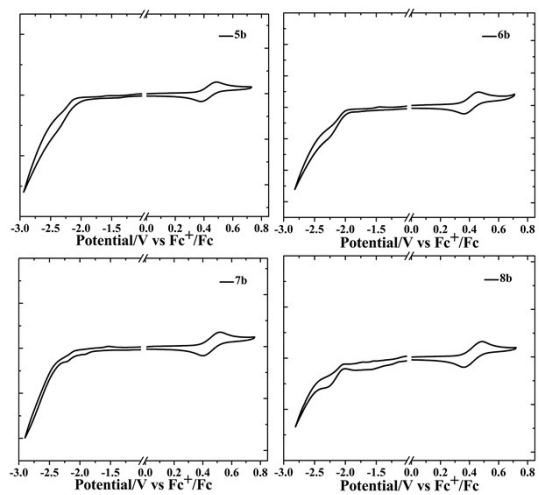

**Fig. S15** Cyclic voltammograms of complexes **5b-8b** in  $\text{CH}_2\text{Cl}_2$  solution in the presence of  $[\text{Bu}_4\text{N}][\text{PF}_6]$  (0.1 M) at 298K.
